# Supplementary material for: Full genome characterization of 12 citrus tatter leaf virus isolates for the development of a detection assay
Source: PubMed Central journal article supplement (PMC6797102; doi:10.1371/journal.pone.0223958), 2019-10-17
Supplement: pone.0223958.s001.pdf [file pone.0223958.s001.pdf]

**S1 Table. Oligonucleotide primers used in this study**

| Primer Name        | Primer Sequence 5'- 3'        | Nucleotide Position <sup>1</sup> | Note                                                                                                        |
|--------------------|-------------------------------|----------------------------------|-------------------------------------------------------------------------------------------------------------|
| CTLV-Outer-1       | CTGAGACCAATCACTCTATCTCTG      | 469-493                          | 5' Outer CTLV gene specific primer, for CTLV isolates TL100, TL101, TL102, TL103, TL110, and TL111          |
| CTLV-Outer-2       | CTAAGACCAATCACTCTACTTCTA      | 469-493                          | 5' Outer CTLV gene specific primer, for CTLV isolates TL115 and IPPN122                                     |
| CTLV-Outer-3       | CTAAGACCAATCACTCTATCTCTA      | 469-493                          | 5' Outer CTLV gene specific primer, for CTLV isolates TL104                                                 |
| CTLV-Outer-4       | CAAGCCAATCACTCTGTCTCTG        | 469-493                          | 5' Outer CTLV gene specific primer, for CTLV isolates TL112, TL113, and TL114                               |
| CTLV-Inner-1       | GGATGGGAATGTGACTTGAATC        | 222-244                          | 5' Inner CTLV gene specific primer, for CTLV isolates IPPN122, TL100, TL101, TL102, TL103, TL110, and TL115 |
| CTLV-Inner-2       | GGATGGGAGTGTGACTTAAATC        | 222-244                          | 5' Inner CTLV gene specific primer, for CTLV isolates TL104 and TL115                                       |
| CTLV-Inner-3       | GGATGAGAATGTGATTTAAATCCAATTGG | 222-244                          | 5' Inner CTLV gene specific primer, for CTLV isolates TL112, TL113, and TL114                               |
| CTLV-CP-Seq-5589-F | GRAAAGAGAGGRTTTAGGTCCTCTCRGC  | 5589-5617                        | 3' RACE CTLV gene specific primer                                                                           |

<sup>1</sup>Nucleotide Position is base on reference genome of citrus tatter leaf virus isolate TL100 (NCBI GenBank Accession No. MH108975).
