# Supplementary material for: Full genome characterization of 12 citrus tatter leaf virus isolates for the development of a detection assay
Source: PubMed Central journal article supplement (PMC6797102; doi:10.1371/journal.pone.0223958), 2019-10-17
Supplement: pone.0223958.s002.pdf [file pone.0223958.s002.pdf]

| Isolate             | GenBank Accession No. | Partial sequence of citrus tatter leaf virus                                                                                                                                              |
|---------------------|-----------------------|-------------------------------------------------------------------------------------------------------------------------------------------------------------------------------------------|
| ASGV-P-209* (apple) | NC001749              | G G T T T T C G A G G C A G G T T C G G A A A G T A A C C T G G A A C T G G A G G G T T A G G A G T C G T G T G A A A T T C C G C A A A C T T G G T C G C G G T C T T G C A G G T T G A C |
| CTLV-IPPN122        | MH108986              | . . . . . G . . . . . C . . . . . T . . . . .                                                                                                                                             |
| CTLV-TL100          | MH108975              | . . . . . G . . . . . A . . . . .                                                                                                                                                         |
| CTLV-TL101          | MH108976              | . . . . . G . . . . . A . . . . .                                                                                                                                                         |
| CTLV-TL102          | MH108977              | . . . . . G . . . . . A . . . . .                                                                                                                                                         |
| CTLV-TL103          | MH108978              | . . . . . G . . . . . G . . . . .                                                                                                                                                         |
| CTLV-TL104          | MH108979              | . . . . . G . . . . . G . A . . . . .                                                                                                                                                     |
| CTLV-TL110          | MH108980              | . . . . . G . . . . . G . . . . .                                                                                                                                                         |
| CTLV-TL111          | MH108981              | . . . . . G . . . . . G . . . . .                                                                                                                                                         |
| CTLV-TL112          | MH108982              | . . . . . G . . . . . A . A . . . . . G . . . . .                                                                                                                                         |
| CTLV-TL113          | MH108983              | . . . . . G . . . . . T . . . . . T . A . . . . .                                                                                                                                         |
| CTLV-TL114          | MH108984              | . . . . . G . . . . . G . T . . . . . T . A . . . . . T . . . . . A . . . . .                                                                                                             |
| CTLV-TL115          | MH108985              | . . . . . G . . . . . G . . . . . G . A . . . . .                                                                                                                                         |
| CTLV-MTH            | KC588948              | . . . . . G . . . . . C . . . . . T . . . . .                                                                                                                                             |
| CTLV-XHC            | KC588947              | . . . . . G . . . . . G . T . . . . . T . A . . . . . T . . . . .                                                                                                                         |
| CTLV-Pk             | JX416228              | . . . . . G . . . . . G . . . . . T . . . . . T . A . . . . .                                                                                                                             |
| CTLV-Ponkan8        | KY706358              | . . . . . G . . . . . G . . . . . T . . . . . T . A . . . . .                                                                                                                             |
| CTLV-ML             | EU553489              | . . . . . G . . . . . G . . . . .                                                                                                                                                         |
| CTLV-Kumquat1       | AY646511              | . . . . . G . . . . . G . T . . . . . T . A . . . . . T . . . . . A . . . . .                                                                                                             |
| CTLV-LCd-NA-1       | FJ355920              | . . . . . T . . . . . G . . . . . T . . . . . T . A . . . . .                                                                                                                             |
| CTLV-Shatang Orange | JQ765412              | . . . . . G . . . . . G . T . . . . . T . A . . . . . T . . . . .                                                                                                                         |
| CTLV-HJY            | MH144341              | . . . . . G . . . . . G . T . . . . . T . A . . . . . T . . . . .                                                                                                                         |
| CTLV-ASGV-1-HJY     | MH144342              | . . . . . T . . . . . G . . . . . C . . . . . A . . . . . G . . . . . T . . . . .                                                                                                         |
| CTLV-ASGV-2-HJY     | MH144343              | . . . . . G . . . . . G . . . . . C . . . . . A . . . . . G . . . . . T . . . . .                                                                                                         |
| ASGV-Matsuco        | LC084659              | . . . . . T . . . . . G . . . . . T . . . . . T . A . . . . .                                                                                                                             |
| ASGV-FKSS2          | LC143387              | . . . . . G . . . . .                                                                                                                                                                     |
| ASGV-N297           | LC184610              | . . . . . T . . . . . G . . . . .                                                                                                                                                         |
| ASGV-Kiyomi         | LC184611              | . . . . . G . . . . . G . . . . . A . . . . .                                                                                                                                             |
| ASGV-Nagami         | LC184612              | . . . . . G . . . . . G . . . . . T . . . . . T . . . . .                                                                                                                                 |
| CTLV 6315 F1        |                       | C G A G G C A G G T T C G G A G A G T A                                                                                                                                                   |
| CTLV 6314 F2        |                       | G A G G C G G T T C G G A G A G T A                                                                                                                                                       |
| CTLV 6314 F3        |                       | T G A G G C A G G T T C G G A G A G T A A                                                                                                                                                 |
| CTLV 6337 P FAM     |                       | T G G A A C T G G A G G G T T A G                                                                                                                                                         |
| CTLV R              |                       | G G T C G C G G T C T T G C A G G                                                                                                                                                         |

**S1 Fig. Citrus tatter leaf virus detection assay targeting region.** Multiple nucleotide sequences alignment of citrus tatter leaf virus and apple stem grooving virus isolated from citrus and citrus relatives host. Citrus tatter leaf virus detection assay targeting region (highlighted in dark grey) and primers-probe set are also shown. Apple stem grooving virus isolate P-209 is used here to represent the species.
