# Supplementary material for: Full genome characterization of 12 citrus tatter leaf virus isolates for the development of a detection assay
Source: PubMed Central journal article supplement (PMC6797102; doi:10.1371/journal.pone.0223958), 2019-10-17
Supplement: pone.0223958.s004.pdf [file pone.0223958.s004.pdf]

S3 Table. Nucleotide sequence identities (%) of 5'-untranslated region (5'-UTR) and polyprotein (not including coat protein region).

| Isolate             | GenBank  | CTLV-IPPN122 | CTLV-TL100 | CTLV-TL101 | CTLV-TL102 | CTLV-TL103 | CTLV-TL104 | CTLV-TL110 | CTLV-TL111 | CTLV-TL112 | CTLV-TL113 | CTLV-TL114 | CTLV-TL115 | CTLV-MTH | CTLV-XHC | CTLV-PK | CTLV-Ponkan8 | CTLV-ML | CTLV-Kumquat1 | CTLV-LCd-NA-1 | CTLV-Shatang Orange | CTLV-HJY | CTLV-ASGV-1-HJY | CTLV-ASGV-2-HJY | ASGV-Matsuco | ASGV-FKSS2 | ASGV-N297 | ASGV-Kiyomi | ASGV-Nagami | CTLV-L | ASGV-Li-23 | ASGV-P-209 | ASGV-p12 | ASGV-AC | ASGV-HH | ASGV-241KP | ASGV-kfp | ASGV-Ac | ASGV-CHN | ASGV-YTG | ASGV-HT | PBNLSV |  |  |  |  |  |  |  |  |  |
|---------------------|----------|--------------|------------|------------|------------|------------|------------|------------|------------|------------|------------|------------|------------|----------|----------|---------|--------------|---------|---------------|---------------|---------------------|----------|-----------------|-----------------|--------------|------------|-----------|-------------|-------------|--------|------------|------------|----------|---------|---------|------------|----------|---------|----------|----------|---------|--------|--|--|--|--|--|--|--|--|--|
| CTLV-IPPN122        | MH108986 |              |            |            |            |            |            |            |            |            |            |            |            |          |          |         |              |         |               |               |                     |          |                 |                 |              |            |           |             |             |        |            |            |          |         |         |            |          |         |          |          |         |        |  |  |  |  |  |  |  |  |  |
| CTLV-TL100          | MH108975 | 80.72        |            |            |            |            |            |            |            |            |            |            |            |          |          |         |              |         |               |               |                     |          |                 |                 |              |            |           |             |             |        |            |            |          |         |         |            |          |         |          |          |         |        |  |  |  |  |  |  |  |  |  |
| CTLV-TL101          | MH108976 | 80.81        | 98.90      |            |            |            |            |            |            |            |            |            |            |          |          |         |              |         |               |               |                     |          |                 |                 |              |            |           |             |             |        |            |            |          |         |         |            |          |         |          |          |         |        |  |  |  |  |  |  |  |  |  |
| CTLV-TL102          | MH108977 | 80.77        | 98.59      | 98.84      |            |            |            |            |            |            |            |            |            |          |          |         |              |         |               |               |                     |          |                 |                 |              |            |           |             |             |        |            |            |          |         |         |            |          |         |          |          |         |        |  |  |  |  |  |  |  |  |  |
| CTLV-TL103          | MH108978 | 80.78        | 98.42      | 98.63      | 98.26      |            |            |            |            |            |            |            |            |          |          |         |              |         |               |               |                     |          |                 |                 |              |            |           |             |             |        |            |            |          |         |         |            |          |         |          |          |         |        |  |  |  |  |  |  |  |  |  |
| CTLV-TL104          | MH108979 | 80.49        | 92.07      | 92.37      | 92.12      | 92.02      |            |            |            |            |            |            |            |          |          |         |              |         |               |               |                     |          |                 |                 |              |            |           |             |             |        |            |            |          |         |         |            |          |         |          |          |         |        |  |  |  |  |  |  |  |  |  |
| CTLV-TL110          | MH108980 | 80.78        | 98.42      | 98.63      | 98.26      | 100.00     | 92.02      |            |            |            |            |            |            |          |          |         |              |         |               |               |                     |          |                 |                 |              |            |           |             |             |        |            |            |          |         |         |            |          |         |          |          |         |        |  |  |  |  |  |  |  |  |  |
| CTLV-TL111          | MH108981 | 80.78        | 98.42      | 98.63      | 98.26      | 100.00     | 92.02      | 100.00     |            |            |            |            |            |          |          |         |              |         |               |               |                     |          |                 |                 |              |            |           |             |             |        |            |            |          |         |         |            |          |         |          |          |         |        |  |  |  |  |  |  |  |  |  |
| CTLV-TL112          | MH108982 | 79.82        | 80.76      | 80.67      | 80.54      | 80.67      | 80.40      | 80.67      | 80.67      |            |            |            |            |          |          |         |              |         |               |               |                     |          |                 |                 |              |            |           |             |             |        |            |            |          |         |         |            |          |         |          |          |         |        |  |  |  |  |  |  |  |  |  |
| CTLV-TL113          | MH108983 | 79.66        | 80.88      | 80.81      | 80.72      | 80.78      | 80.81      | 80.78      | 80.78      | 80.78      | 94.11      |            |            |          |          |         |              |         |               |               |                     |          |                 |                 |              |            |           |             |             |        |            |            |          |         |         |            |          |         |          |          |         |        |  |  |  |  |  |  |  |  |  |
| CTLV-TL114          | MH108984 | 80.01        | 80.78      | 80.77      | 80.65      | 80.67      | 81.08      | 80.67      | 80.67      | 92.83      | 96.27      |            |            |          |          |         |              |         |               |               |                     |          |                 |                 |              |            |           |             |             |        |            |            |          |         |         |            |          |         |          |          |         |        |  |  |  |  |  |  |  |  |  |
| CTLV-TL115          | MH108985 | 80.24        | 91.64      | 91.75      | 91.59      | 91.45      | 95.40      | 91.45      | 91.45      | 80.40      | 80.83      | 81.20      |            |          |          |         |              |         |               |               |                     |          |                 |                 |              |            |           |             |             |        |            |            |          |         |         |            |          |         |          |          |         |        |  |  |  |  |  |  |  |  |  |
| CTLV-MTH            | KC588948 | 85.10        | 80.76      | 80.68      | 80.54      | 80.63      | 80.99      | 80.63      | 80.63      | 80.70      | 80.65      | 81.17      | 80.90      |          |          |         |              |         |               |               |                     |          |                 |                 |              |            |           |             |             |        |            |            |          |         |         |            |          |         |          |          |         |        |  |  |  |  |  |  |  |  |  |
| CTLV-XHC            | KC588947 | 79.37        | 80.15      | 80.10      | 80.10      | 80.17      | 80.10      | 80.17      | 80.17      | 94.87      | 93.22      | 94.29      | 80.39      | 80.44    |          |         |              |         |               |               |                     |          |                 |                 |              |            |           |             |             |        |            |            |          |         |         |            |          |         |          |          |         |        |  |  |  |  |  |  |  |  |  |
| CTLV-Pk             | JX416228 | 79.59        | 80.72      | 80.65      | 80.58      | 80.62      | 80.72      | 80.62      | 80.62      | 93.56      | 99.34      | 96.08      | 80.78      | 80.72    | 93.31    |         |              |         |               |               |                     |          |                 |                 |              |            |           |             |             |        |            |            |          |         |         |            |          |         |          |          |         |        |  |  |  |  |  |  |  |  |  |
| CTLV-Ponkan8        | KY706358 | 79.59        | 80.72      | 80.65      | 80.58      | 80.62      | 80.72      | 80.62      | 80.62      | 93.56      | 99.34      | 96.08      | 80.78      | 80.72    | 93.31    | 100.00  |              |         |               |               |                     |          |                 |                 |              |            |           |             |             |        |            |            |          |         |         |            |          |         |          |          |         |        |  |  |  |  |  |  |  |  |  |
| CTLV-ML             | EU553489 | 80.78        | 98.42      | 98.63      | 98.26      | 100.00     | 92.02      | 100.00     | 100.00     | 80.67      | 80.78      | 80.67      | 91.45      | 80.63    | 80.17    | 80.62   | 80.62        |         |               |               |                     |          |                 |                 |              |            |           |             |             |        |            |            |          |         |         |            |          |         |          |          |         |        |  |  |  |  |  |  |  |  |  |
| CTLV-Kumquat1       | AY646511 | 79.87        | 80.63      | 80.61      | 80.63      | 80.59      | 80.58      | 80.59      | 80.59      | 94.75      | 93.43      | 94.85      | 80.82      | 80.93    | 97.51    | 93.52   | 93.52        | 80.59   |               |               |                     |          |                 |                 |              |            |           |             |             |        |            |            |          |         |         |            |          |         |          |          |         |        |  |  |  |  |  |  |  |  |  |
| CTLV-LCd-NA-1       | FJ355920 | 79.74        | 80.75      | 80.67      | 80.54      | 80.67      | 80.36      | 80.67      | 80.67      | 99.85      | 94.18      | 92.83      | 80.40      | 80.56    | 94.87    | 93.56   | 93.56        | 80.67   | 94.75         |               |                     |          |                 |                 |              |            |           |             |             |        |            |            |          |         |         |            |          |         |          |          |         |        |  |  |  |  |  |  |  |  |  |
| CTLV-Shatang Orange | JQ765412 | 79.94        | 80.40      | 80.35      | 80.36      | 80.44      | 80.30      | 80.44      | 80.44      | 95.01      | 93.72      | 94.69      | 80.58      | 80.86    | 97.94    | 93.74   | 93.74        | 80.44   | 97.92         | 95.01         |                     |          |                 |                 |              |            |           |             |             |        |            |            |          |         |         |            |          |         |          |          |         |        |  |  |  |  |  |  |  |  |  |
| CTLV-HJY            | MH144341 | 79.80        | 80.63      | 80.51      | 80.58      | 80.65      | 80.39      | 80.65      | 80.65      | 94.48      | 93.33      | 94.13      | 80.62      | 80.79    | 97.00    | 93.42   | 93.42        | 80.65   | 96.94         | 94.52         | 97.34               |          |                 |                 |              |            |           |             |             |        |            |            |          |         |         |            |          |         |          |          |         |        |  |  |  |  |  |  |  |  |  |
| CTLV-ASGV-1-HJY     | MH144342 | 80.85        | 80.67      | 80.61      | 80.59      | 80.53      | 81.50      | 80.53      | 80.53      | 79.48      | 79.57      | 79.96      | 81.20      | 80.78    | 79.39    | 79.59   | 79.59        | 80.53   | 79.48         | 79.48         | 79.53               | 79.60    |                 |                 |              |            |           |             |             |        |            |            |          |         |         |            |          |         |          |          |         |        |  |  |  |  |  |  |  |  |  |
| CTLV-ASGV-2-HJY     | MH144343 | 85.56        | 80.10      | 79.90      | 80.04      | 79.91      | 80.42      | 79.91      | 79.91      | 80.30      | 80.30      | 80.60      | 80.07      | 89.89    | 79.82    | 80.30   | 80.30        | 79.91   | 80.33         | 80.15         | 80.07               | 80.21    | 80.93           |                 |              |            |           |             |             |        |            |            |          |         |         |            |          |         |          |          |         |        |  |  |  |  |  |  |  |  |  |
| ASGV-Matsuco        | LC084659 | 79.59        | 80.54      | 80.49      | 80.40      | 80.54      | 80.35      | 80.54      | 80.54      | 93.81      | 94.76      | 93.38      | 80.62      | 81.09    | 93.72    | 94.85   | 94.85        | 80.54   | 93.66         | 93.81         | 94.06               | 93.70    | 79.30           | 80.12           |              |            |           |             |             |        |            |            |          |         |         |            |          |         |          |          |         |        |  |  |  |  |  |  |  |  |  |
| ASGV-FKSS2          | LC143387 | 82.28        | 80.23      | 80.04      | 80.17      | 80.08      | 80.42      | 80.08      | 80.08      | 80.19      | 80.24      | 80.37      | 80.31      | 82.51    | 79.59    | 80.23   | 80.23        | 80.08   | 80.06         | 80.12         | 79.87               | 79.78    | 80.72           | 82.30           | 80.17        |            |           |             |             |        |            |            |          |         |         |            |          |         |          |          |         |        |  |  |  |  |  |  |  |  |  |
| ASGV-N297           | LC184610 | 81.70        | 80.30      | 79.97      | 80.10      | 80.05      | 80.17      | 80.05      | 80.05      | 80.01      | 80.07      | 80.24      | 80.00      | 82.48    | 79.62    | 80.15   | 80.15        | 80.05   | 80.08         | 79.94         | 79.91               | 79.68    | 80.76           | 82.12           | 80.17        | 94.82      |           |             |             |        |            |            |          |         |         |            |          |         |          |          |         |        |  |  |  |  |  |  |  |  |  |
| ASGV-Kiyomi         | LC184611 | 80.35        | 91.91      | 92.09      | 91.89      | 91.79      | 95.54      | 91.79      | 91.79      | 80.39      | 80.70      | 81.04      | 98.65      | 80.95    | 80.39    | 80.69   | 80.69        | 91.79   | 80.79         | 80.35         | 80.54               | 80.54    | 81.25           | 80.14           | 80.58        | 80.35      | 80.10     |             |             |        |            |            |          |         |         |            |          |         |          |          |         |        |  |  |  |  |  |  |  |  |  |
| ASGV-Nagami         | LC184612 | 85.31        | 81.08      | 80.91      | 80.95      | 80.99      | 81.04      | 80.99      | 80.99      | 81.08      | 80.95      | 80.99      | 80.74      | 90.88    | 80.47    | 81.04   | 81.04        | 80.99   | 80.86         | 80.97         | 80.95               | 80.93    | 81.04           | 92.94           | 81.08        | 82.21      | 82.19     | 80.85       |             |        |            |            |          |         |         |            |          |         |          |          |         |        |  |  |  |  |  |  |  |  |  |
| CTLV-L              | D16681   | 81.68        | 79.76      | 79.69      | 79.74      | 79.80      | 79.60      | 79.80      | 79.80      | 79.81      | 80.06      | 80.01      | 79.76      | 81.68    | 79.42    | 80.15   | 80.15        | 79.80   | 79.89         | 79.78         | 79.65               | 79.58    | 80.45           | 81.37           | 79.81        | 94.39      | 93.70     | 79.76       | 81.34       |        |            |            |          |         |         |            |          |         |          |          |         |        |  |  |  |  |  |  |  |  |  |
| ASGV-Li-23          | AB004063 | 81.62        | 79.64      | 79.55      | 79.60      | 79.64      | 79.48      | 79.64      | 79.64      | 79.81      | 80.01      | 79.94      | 79.49      | 81.46    | 79.35    | 80.13   | 80.13        | 79.64   | 79.74         | 79.76         | 79.60               | 79.55    | 80.31           | 81.43           | 79.76        | 94.20      | 93.42     | 79.49       | 81.34       | 98.27  |            |            |          |         |         |            |          |         |          |          |         |        |  |  |  |  |  |  |  |  |  |
| ASGV-P-209          | NC001749 | 85.01        | 80.59      | 80.31      | 80.40      | 80.33      | 80.43      | 80.33      | 80.33      | 80.45      | 80.28      | 80.65      | 80.56      | 90.81    | 80.04    | 80.36   | 80.36        | 80.33   | 80.58         | 80.33         | 80.36               | 80.58    | 81.18           | 92.32           | 80.47        | 81.98      | 81.84     | 80.61       | 93.13       | 81.46  | 81.41      |            |          |         |         |            |          |         |          |          |         |        |  |  |  |  |  |  |  |  |  |
| ASGVp12             | HE978837 | 79.68        | 80.14      | 80.18      | 79.95      | 80.06      | 80.11      | 80.06      | 80.06      | 80.41      | 80.39      | 80.66      | 80.00      | 79.82    | 80.20    | 80.25   | 80.25        | 80.06   | 80.27         | 80.34         | 80.23               | 80.30    | 80.54           | 79.26           | 80.14        | 79.63      | 79.68     | 80.16       | 79.97       | 78.93  | 78.97      | 80.23      |          |         |         |            |          |         |          |          |         |        |  |  |  |  |  |  |  |  |  |
| ASGV-AC             | KX988001 | 80.40        | 80.65      | 80.65      | 80.49      | 80.49      | 80.67      | 80.49      | 8          |            |            |            |            |          |          |         |              |         |               |               |                     |          |                 |                 |              |            |           |             |             |        |            |            |          |         |         |            |          |         |          |          |         |        |  |  |  |  |  |  |  |  |  |
