# Supplementary material for: Full genome characterization of 12 citrus tatter leaf virus isolates for the development of a detection assay
Source: PubMed Central journal article supplement (PMC6797102; doi:10.1371/journal.pone.0223958), 2019-10-17
Supplement: pone.0223958.s006.pdf [file pone.0223958.s006.pdf]

S5 Table. Nucleotide sequence identities (%) of movement protein (MP).

| Isolate             | GenBank  | CTLV-V-IPPN122 | CTLV-TL100 | CTLV-TL101 | CTLV-TL102 | CTLV-TL103 | CTLV-TL104 | CTLV-TL110 | CTLV-TL111 | CTLV-TL112 | CTLV-TL113 | CTLV-TL114 | CTLV-TL115 | CTLV-MTH | CTLV-XHC | CTLV-Pk | CTLV-Ponkan8 | CTLV-ML | CTLV-Kumquat1 | CTLV-LCd-NA-1 | CTLV-Shatang Orange | CTLV-HJY | CTLV-ASGV-1-HJY | CTLV-ASGV-2-HJY | ASGV-Matsuo | ASGV-FKSS2 | ASGV-N297 | ASGV-Kiyomi | ASGV-p12 | ASGV-AC | ASGV-HH | ASGV-41KP | ASGV-Ac | ASGV-CHN | ASGV-YTG | ASGV-HT | PBNLSV |  |  |  |
|---------------------|----------|----------------|------------|------------|------------|------------|------------|------------|------------|------------|------------|------------|------------|----------|----------|---------|--------------|---------|---------------|---------------|---------------------|----------|-----------------|-----------------|-------------|------------|-----------|-------------|----------|---------|---------|-----------|---------|----------|----------|---------|--------|--|--|--|
| CTLV-IPPN122        | MH108986 | 85.87          |            |            |            |            |            |            |            |            |            |            |            |          |          |         |              |         |               |               |                     |          |                 |                 |             |            |           |             |          |         |         |           |         |          |          |         |        |  |  |  |
| CTLV-TL100          | MH108975 | 86.29          | 98.85      |            |            |            |            |            |            |            |            |            |            |          |          |         |              |         |               |               |                     |          |                 |                 |             |            |           |             |          |         |         |           |         |          |          |         |        |  |  |  |
| CTLV-TL101          | MH108976 | 86.18          | 98.44      | 98.96      |            |            |            |            |            |            |            |            |            |          |          |         |              |         |               |               |                     |          |                 |                 |             |            |           |             |          |         |         |           |         |          |          |         |        |  |  |  |
| CTLV-TL102          | MH108977 | 86.08          | 98.54      | 98.85      | 98.44      |            |            |            |            |            |            |            |            |          |          |         |              |         |               |               |                     |          |                 |                 |             |            |           |             |          |         |         |           |         |          |          |         |        |  |  |  |
| CTLV-TL103          | MH108978 | 87.33          | 94.28      | 94.60      | 94.60      | 94.91      |            |            |            |            |            |            |            |          |          |         |              |         |               |               |                     |          |                 |                 |             |            |           |             |          |         |         |           |         |          |          |         |        |  |  |  |
| CTLV-TL104          | MH108979 | 86.08          | 98.54      | 98.85      | 98.44      | 100.00     | 94.91      |            |            |            |            |            |            |          |          |         |              |         |               |               |                     |          |                 |                 |             |            |           |             |          |         |         |           |         |          |          |         |        |  |  |  |
| CTLV-TL110          | MH108980 | 86.08          | 98.54      | 98.85      | 98.44      | 100.00     | 94.91      | 100.00     |            |            |            |            |            |          |          |         |              |         |               |               |                     |          |                 |                 |             |            |           |             |          |         |         |           |         |          |          |         |        |  |  |  |
| CTLV-TL111          | MH108981 | 86.08          | 98.54      | 98.85      | 98.44      | 100.00     | 94.91      | 100.00     | 88.16      |            |            |            |            |          |          |         |              |         |               |               |                     |          |                 |                 |             |            |           |             |          |         |         |           |         |          |          |         |        |  |  |  |
| CTLV-TL112          | MH108982 | 85.56          | 88.47      | 88.05      | 87.64      | 88.16      | 86.91      | 88.16      | 88.16      | 88.16      |            |            |            |          |          |         |              |         |               |               |                     |          |                 |                 |             |            |           |             |          |         |         |           |         |          |          |         |        |  |  |  |
| CTLV-TL113          | MH108983 | 85.56          | 87.12      | 86.70      | 86.50      | 87.01      | 86.08      | 87.01      | 87.01      | 87.01      | 94.91      |            |            |          |          |         |              |         |               |               |                     |          |                 |                 |             |            |           |             |          |         |         |           |         |          |          |         |        |  |  |  |
| CTLV-TL114          | MH108984 | 85.77          | 86.70      | 86.50      | 86.70      | 86.60      | 86.18      | 86.60      | 86.60      | 94.91      | 95.01      |            |            |          |          |         |              |         |               |               |                     |          |                 |                 |             |            |           |             |          |         |         |           |         |          |          |         |        |  |  |  |
| CTLV-TL115          | MH108985 | 86.39          | 93.66      | 93.76      | 93.97      | 94.49      | 96.88      | 94.49      | 94.49      | 86.18      | 85.56      | 86.29      |            |          |          |         |              |         |               |               |                     |          |                 |                 |             |            |           |             |          |         |         |           |         |          |          |         |        |  |  |  |
| CTLV-MTH            | KC588948 | 87.33          | 85.66      | 85.35      | 85.15      | 85.46      | 86.29      | 85.46      | 85.46      | 84.73      | 85.35      | 85.87      | 86.29      |          |          |         |              |         |               |               |                     |          |                 |                 |             |            |           |             |          |         |         |           |         |          |          |         |        |  |  |  |
| CTLV-XHC            | KC588947 | 84.63          | 86.29      | 85.87      | 85.87      | 86.18      | 85.35      | 86.18      | 86.18      | 94.08      | 93.87      | 97.40      | 85.66      | 85.04    |          |         |              |         |               |               |                     |          |                 |                 |             |            |           |             |          |         |         |           |         |          |          |         |        |  |  |  |
| CTLV-Pk             | JX416228 | 85.56          | 87.12      | 86.70      | 86.50      | 87.01      | 86.08      | 87.01      | 87.01      | 94.91      | 100.00     | 95.01      | 85.56      | 85.35    | 93.87    |         |              |         |               |               |                     |          |                 |                 |             |            |           |             |          |         |         |           |         |          |          |         |        |  |  |  |
| CTLV-Ponkan8        | KY706358 | 85.56          | 87.12      | 86.70      | 86.50      | 87.01      | 86.08      | 87.01      | 87.01      | 94.91      | 100.00     | 95.01      | 85.56      | 85.35    | 93.87    | 100.00  |              |         |               |               |                     |          |                 |                 |             |            |           |             |          |         |         |           |         |          |          |         |        |  |  |  |
| CTLV-ML             | EU553489 | 86.08          | 98.54      | 98.85      | 98.44      | 100.00     | 94.91      | 100.00     | 100.00     | 88.16      | 87.01      | 86.60      | 94.49      | 85.46    | 86.18    | 87.01   | 87.01        |         |               |               |                     |          |                 |                 |             |            |           |             |          |         |         |           |         |          |          |         |        |  |  |  |
| CTLV-Kumquat1       | AY646511 | 85.77          | 86.70      | 86.50      | 86.70      | 86.60      | 86.18      | 86.60      | 86.60      | 94.91      | 95.01      | 100.00     | 86.29      | 85.87    | 97.40    | 95.01   | 95.01        | 86.60   |               |               |                     |          |                 |                 |             |            |           |             |          |         |         |           |         |          |          |         |        |  |  |  |
| CTLV-LCd-NA-1       | FJ355920 | 85.87          | 88.47      | 88.05      | 87.64      | 88.16      | 86.91      | 88.16      | 88.16      | 99.58      | 95.32      | 95.11      | 86.18      | 85.04    | 94.49    | 95.32   | 95.32        | 88.16   | 95.11         |               |                     |          |                 |                 |             |            |           |             |          |         |         |           |         |          |          |         |        |  |  |  |
| CTLV-Shatang Orange | JQ765412 | 85.35          | 86.50      | 86.29      | 86.29      | 86.60      | 85.98      | 86.60      | 86.60      | 95.01      | 94.70      | 98.44      | 86.08      | 85.46    | 97.71    | 94.70   | 94.70        | 86.60   | 98.44         | 95.43         |                     |          |                 |                 |             |            |           |             |          |         |         |           |         |          |          |         |        |  |  |  |
| CTLV-HJY            | MH144341 | 85.46          | 86.91      | 86.50      | 86.50      | 86.81      | 86.39      | 86.81      | 86.81      | 94.80      | 94.60      | 97.61      | 86.50      | 85.77    | 97.09    | 94.60   | 94.60        | 86.81   | 97.61         | 95.22         | 97.71               |          |                 |                 |             |            |           |             |          |         |         |           |         |          |          |         |        |  |  |  |
| CTLV-ASGV-1-HJY     | MH144342 | 84.42          | 86.18      | 86.08      | 86.08      | 85.98      | 87.33      | 85.98      | 85.98      | 84.63      | 84.83      | 85.46      | 86.81      | 84.31    | 85.25    | 84.83   | 84.83        | 85.98   | 85.46         | 84.63         | 84.83               | 84.83    |                 |                 |             |            |           |             |          |         |         |           |         |          |          |         |        |  |  |  |
| CTLV-ASGV-2-HJY     | MH144343 | 89.92          | 84.94      | 84.63      | 84.83      | 84.73      | 86.18      | 84.73      | 84.73      | 84.21      | 84.83      | 84.94      | 85.25      | 90.34    | 83.90    | 84.83   | 84.83        | 84.73   | 84.94         | 84.52         | 84.11               | 84.83    | 84.11           |                 |             |            |           |             |          |         |         |           |         |          |          |         |        |  |  |  |
| ASGV-Matsuo         | LC084659 | 84.94          | 87.33      | 86.91      | 86.70      | 87.43      | 86.29      | 87.43      | 87.43      | 95.43      | 96.57      | 94.91      | 86.39      | 85.46    | 94.80    | 96.57   | 96.57        | 87.43   | 94.91         | 95.84         | 95.32               | 95.11    | 84.94           | 84.52           |             |            |           |             |          |         |         |           |         |          |          |         |        |  |  |  |
| ASGV-FKSS2          | LC143387 | 85.87          | 86.29      | 85.98      | 85.98      | 86.08      | 86.08      | 86.08      | 86.08      | 84.11      | 85.25      | 85.35      | 85.66      | 86.60    | 84.31    | 85.25   | 85.25        | 86.08   | 85.35         | 84.31         | 84.63               | 85.15    | 84.31           | 86.91           | 84.42       |            |           |             |          |         |         |           |         |          |          |         |        |  |  |  |
| ASGV-N297           | LC184610 | 85.46          | 86.08      | 85.77      | 85.35      | 85.66      | 85.66      | 85.66      | 85.66      | 84.11      | 85.04      | 85.25      | 85.25      | 86.08    | 84.42    | 85.04   | 85.04        | 85.66   | 85.25         | 84.31         | 84.73               | 85.04    | 85.15           | 86.70           | 84.83       | 96.05      |           |             |          |         |         |           |         |          |          |         |        |  |  |  |
| ASGV-Kiyomi         | LC184611 | 86.91          | 94.18      | 94.49      | 94.49      | 95.01      | 97.61      | 95.01      | 95.01      | 86.81      | 85.56      | 86.29      | 98.65      | 86.39    | 85.66    | 85.56   | 85.56        | 95.01   | 86.29         | 86.81         | 86.08               | 86.50    | 87.22           | 85.77           | 86.39       | 85.98      | 85.35     |             |          |         |         |           |         |          |          |         |        |  |  |  |
| ASGV-Nagami         | LC184612 | 87.12          | 85.98      | 85.66      | 85.46      | 86.18      | 86.60      | 86.18      | 86.18      | 85.87      | 85.25      | 85.35      | 86.39      | 92.52    | 84.31    | 85.25   | 85.25        | 86.18   | 85.35         | 85.98         | 85.15               | 85.25    | 84.73           | 91.38           | 85.25       | 86.18      | 86.29     | 86.70       |          |         |         |           |         |          |          |         |        |  |  |  |
| CTLV-L              | D16681   | 84.63          | 84.83      | 84.73      | 84.52      | 84.83      | 84.11      | 84.83      | 84.83      | 83.07      | 85.04      | 84.11      | 84.21      | 84.63    | 83.28    | 85.04   | 85.04        | 84.83   | 84.11         | 83.28         | 83.59               | 83.90    | 83.80           | 85.66           | 83.80       | 95.84      | 94.80     | 84.52       | 84.52    |         |         |           |         |          |          |         |        |  |  |  |
| ASGV-Li-23          | AB004063 | 84.94          | 85.25      | 85.15      | 84.94      | 85.04      | 84.31      | 85.04      | 85.04      | 83.28      | 85.25      | 84.31      | 84.21      | 84.94    | 83.48    | 85.25   | 85.25        | 85.04   | 84.31         | 83.48         | 83.80               | 84.11    | 84.11           | 85.98           | 84.00       | 96.26      | 95.43     | 84.52       | 84.63    | 98.75   |         |           |         |          |          |         |        |  |  |  |
| ASGV-P-209          | NC001749 | 87.43          | 85.25      | 84.52      | 84.73      | 84.83      | 85.87      | 84.83      | 84.83      | 85.66      | 85.35      | 86.08      | 85.46      | 91.58    | 85.35    | 85.35   | 85.35        | 84.83   | 86.08         | 85.98         | 85.56               | 86.08    | 84.00           | 90.23           | 85.66       | 86.91      | 86.70     | 85.56       | 92.93    | 84.73   | 85.15   |           |         |          |          |         |        |  |  |  |
| ASGVp12             | HE978837 | 84.11          | 85.66      | 85.56      | 85.46      | 85.66      | 85.04      | 85.66      | 85.66      | 86.29      | 86.18      | 87.01      | 85.77      | 84.21    | 86.81    | 86.18   | 86.18        | 85.66   | 87.01         | 86.60         | 86.70               | 86.81    | 84.11           | 83.28           | 87.01       | 84.73      | 85.25     | 85.87       | 83.59    | 83.80   | 83.59   | 84.83     |         |          |          |         |        |  |  |  |
| ASGV-AC             | KX988001 | 84.83          | 86.29      | 85.98      | 85.87      | 86.08      | 85.87      | 86.08      | 86.08      | 86.81      | 86.60      | 87.12      | 85.98      | 85.04    | 86.91    | 86.60   | 86.60        | 86.08   | 87.12         | 87.12         | 86.60               | 86.70    | 85.25           | 83.90           | 87.33       | 85.04      | 85.77     | 86.70       | 84.63    | 84.11   | 84.11   | 85.66     | 97.50   |          |          |         |        |  |  |  |
| ASGV-HH             | JN701424 | 84.52          | 84.42      | 84.00      | 84.21      | 83.80      | 84.94      | 83.80      | 83.80      | 83.90      | 85.35      | 84.52      | 84.63      | 84.83    | 83.17    | 85.35   | 85.35        | 83.80   | 84.52         | 84.21         | 84.11               | 84.42    | 83.80           | 85.35           | 84.42       | 88.57      | 88.99     | 84.73       | 85.87    | 87.64   | 87.43   | 86.50     | 83.80   | 84.11    |          |         |        |  |  |  |
| ASGV-241KP          | D14995   | 87.43          | 85.25      | 84.52      | 84.73      | 84.83      | 85.87      | 84.83      | 84.83      | 85.66      | 85.35      | 86.08      | 85.46      | 91.58    | 85.35    | 85.35   | 85.35        | 84.83   | 86.08         | 85.98         | 85.56               | 86.08    | 84.00           | 90.23           | 85.66       | 86.91      | 86.70     | 85.56       | 92.93    | 84.73   | 85.15   | 100.00    | 84.83   | 85.66    | 86.50    |         |        |  |  |  |
| ASGV-kfp            | KR106996 | 84.52          | 84.42      | 84.52      | 84.42      | 84.63      | 85.46      | 84.63      | 84.63      | 83.17      | 84.21      | 83.90      | 85.66      | 84.42    | 83.17    | 84.21   | 84.21        | 84.63   | 83.90         | 83.38         | 83.48               | 84.00    | 84.83           | 84.00           | 84.83       | 83.69      | 84.63     | 85.35       | 83.69    | 83.48   | 83.69   | 83.07     | 85.66   | 86.60    | 83.90    | 83.07   |        |  |  |  |
|                     |          |                |            |            |            |            |            |            |            |            |            |            |            |          |          |         |              |         |               |               |                     |          |                 |                 |             |            |           |             |          |         |         |           |         |          |          |         |        |  |  |  |
