# Supplementary material for: Full genome characterization of 12 citrus tatter leaf virus isolates for the development of a detection assay
Source: PubMed Central journal article supplement (PMC6797102; doi:10.1371/journal.pone.0223958), 2019-10-17
Supplement: pone.0223958.s007.pdf [file pone.0223958.s007.pdf]

**S6 Table. Nucleotide (below diagonal) and amino acid (above diagonal) sequences identities (%) of variable region I (VRI) of citrus tatter leaf virus and apple stem grooving virus isolated from citrus and citrus relat**

| Isolate             | GenBank  | CTLV-IPPN122 | CTLV-TL100 | CTLV-TL101 | CTLV-TL102 | CTLV-TL103 | CTLV-TL104 | CTLV-TL110 | CTLV-TL111 | CTLV-TL112 | CTLV-TL113 | CTLV-TL114 | CTLV-TL115 | CTLV-MTH | CTLV-XHC | CTLV-Pk | CTLV-Ponkan8 | CTLV-ML | CTLV-Kumquat1 | CTLV-LCd-NA-1 | CTLV-Shatang Orange | CTLV-HJY | CTLV-ASGV-1-HJY | CTLV-ASGV-2-HJY | ASGV-Matsuco | ASGV-FKSS2 | ASGV-N297 | ASGV-Kiyomi | ASGV-Nagami |       |
|---------------------|----------|--------------|------------|------------|------------|------------|------------|------------|------------|------------|------------|------------|------------|----------|----------|---------|--------------|---------|---------------|---------------|---------------------|----------|-----------------|-----------------|--------------|------------|-----------|-------------|-------------|-------|
| CTLV-IPPN122        | MH108986 |              | 10.25      | 10.25      | 10.25      | 10.25      | 20.51      | 10.25      | 10.25      | 17.94      | 20.51      | 20.51      | 17.94      | 38.46    | 17.94    | 20.51   | 20.51        | 10.25   | 20.51         | 17.94         | 17.94               | 17.94    | 20.51           | 28.20           | 17.94        | 33.33      | 28.20     | 17.94       | 30.76       |       |
| CTLV-TL100          | MH108975 | 41.88        |            | 94.87      | 94.87      | 97.43      | 74.35      | 97.43      | 97.43      | 12.82      | 10.25      | 10.25      | 69.23      | 12.82    | 12.82    | 10.25   | 10.25        | 97.43   | 17.94         | 12.82         | 12.82               | 15.38    | 17.94           | 12.82           | 12.82        | 17.94      | 25.64     | 71.79       | 15.38       |       |
| CTLV-TL101          | MH108976 | 40.17        | 98.29      |            | 94.87      | 97.43      | 69.23      | 97.43      | 97.43      | 12.82      | 12.82      | 12.82      | 64.10      | 12.82    | 12.82    | 12.82   | 12.82        | 97.43   | 17.94         | 12.82         | 12.82               | 15.38    | 20.51           | 12.82           | 10.25        | 12.82      | 20.51     | 66.66       | 15.38       |       |
| CTLV-TL102          | MH108977 | 41.02        | 98.29      | 98.29      |            | 97.43      | 69.23      | 97.43      | 97.43      | 12.82      | 10.25      | 10.25      | 64.10      | 10.25    | 12.82    | 10.25   | 10.25        | 97.43   | 17.94         | 12.82         | 12.82               | 15.38    | 20.51           | 15.38           | 10.25        | 15.38      | 23.07     | 66.66       | 17.94       |       |
| CTLV-TL103          | MH108978 | 41.02        | 97.43      | 97.43      | 97.43      |            | 71.79      | 100.00     | 100.00     | 12.82      | 10.25      | 10.25      | 66.66      | 10.25    | 12.82    | 10.25   | 10.25        | 100.00  | 17.94         | 12.82         | 12.82               | 15.38    | 20.51           | 15.38           | 10.25        | 15.38      | 23.07     | 69.23       | 17.94       |       |
| CTLV-TL104          | MH108979 | 39.31        | 82.90      | 81.19      | 81.19      | 80.34      |            | 71.79      | 71.79      | 15.38      | 15.38      | 15.38      | 87.17      | 17.94    | 15.38    | 15.38   | 15.38        | 71.79   | 17.94         | 15.38         | 15.38               | 17.94    | 20.51           | 17.94           | 17.94        | 23.07      | 30.76     | 89.74       | 25.64       |       |
| CTLV-TL110          | MH108980 | 41.02        | 97.43      | 97.43      | 97.43      | 100.00     | 80.34      |            | 100.00     | 12.82      | 10.25      | 10.25      | 66.66      | 10.25    | 12.82    | 10.25   | 10.25        | 100.00  | 17.94         | 12.82         | 12.82               | 15.38    | 20.51           | 15.38           | 10.25        | 15.38      | 23.07     | 69.23       | 17.94       |       |
| CTLV-TL111          | MH108981 | 41.02        | 97.43      | 97.43      | 97.43      | 100.00     | 80.34      | 100.00     |            | 12.82      | 10.25      | 10.25      | 66.66      | 10.25    | 12.82    | 10.25   | 10.25        | 100.00  | 17.94         | 12.82         | 12.82               | 15.38    | 20.51           | 15.38           | 10.25        | 15.38      | 23.07     | 69.23       | 17.94       |       |
| CTLV-TL112          | MH108982 | 39.31        | 42.73      | 42.73      | 41.88      | 41.02      | 37.60      | 41.02      | 41.02      |            | 79.48      | 79.48      | 15.38      | 25.64    | 94.87    | 79.48   | 79.48        | 12.82   | 89.74         | 100.00        | 100.00              | 92.30    | 15.38           | 10.25           | 82.05        | 12.82      | 15.38     | 15.38       | 23.07       |       |
| CTLV-TL113          | MH108983 | 37.60        | 39.31      | 39.31      | 38.46      | 37.60      | 40.17      | 37.60      | 37.60      | 85.47      |            | 100.00     | 17.94      | 30.76    | 79.48    | 100.00  | 100.00       | 10.25   | 69.23         | 79.48         | 79.48               | 76.92    | 20.51           | 7.69            | 82.05        | 15.38      | 20.51     | 17.94       | 23.07       |       |
| CTLV-TL114          | MH108984 | 37.60        | 39.31      | 39.31      | 38.46      | 37.60      | 40.17      | 37.60      | 37.60      | 85.47      | 100.00     |            | 17.94      | 30.76    | 79.48    | 100.00  | 100.00       | 10.25   | 69.23         | 79.48         | 79.48               | 76.92    | 20.51           | 7.69            | 82.05        | 15.38      | 20.51     | 17.94       | 23.07       |       |
| CTLV-TL115          | MH108985 | 38.46        | 80.34      | 78.63      | 78.63      | 77.77      | 90.59      | 77.77      | 77.77      | 40.17      | 41.88      | 41.88      |            | 20.51    | 15.38    | 17.94   | 17.94        | 66.66   | 17.94         | 15.38         | 15.38               | 17.94    | 23.07           | 12.82           | 20.51        | 20.51      | 28.20     | 97.43       | 20.51       |       |
| CTLV-MTH            | KC588948 | 52.99        | 46.15      | 46.15      | 45.29      | 43.58      | 46.15      | 43.58      | 43.58      | 45.29      | 47.86      | 47.86      | 47.00      |          | 28.20    | 30.76   | 30.76        | 10.25   | 20.51         | 25.64         | 25.64               | 25.64    | 20.51           | 51.28           | 28.20        | 28.20      | 41.02     | 20.51       | 61.53       |       |
| CTLV-XHC            | KC588947 | 38.46        | 43.58      | 43.58      | 42.73      | 41.88      | 38.46      | 41.88      | 41.88      | 97.43      | 86.32      | 86.32      | 41.02      | 46.15    |          | 79.48   | 79.48        | 12.82   | 84.61         | 94.87         | 94.87               | 87.17    | 17.94           | 12.82           | 76.92        | 12.82      | 15.38     | 15.38       | 28.20       |       |
| CTLV-Pk             | JX416228 | 37.60        | 39.31      | 39.31      | 38.46      | 37.60      | 40.17      | 37.60      | 37.60      | 85.47      | 100.00     | 100.00     |            | 41.88    | 47.86    | 86.32   |              | 100.00  | 10.25         | 69.23         | 79.48               | 79.48    | 76.92           | 20.51           | 7.69         | 82.05      | 15.38     | 20.51       | 17.94       | 23.07 |
| CTLV-Ponkan8        | KY706358 | 37.60        | 39.31      | 39.31      | 38.46      | 37.60      | 40.17      | 37.60      | 37.60      | 85.47      | 100.00     | 100.00     | 41.88      | 47.86    | 86.32    | 100.00  |              | 10.25   | 69.23         | 79.48         | 79.48               | 76.92    | 20.51           | 7.69            | 82.05        | 15.38      | 20.51     | 17.94       | 23.07       |       |
| CTLV-ML             | EU553489 | 41.02        | 97.43      | 97.43      | 97.43      | 100.00     | 80.34      | 100.00     | 100.00     | 41.02      | 37.60      | 37.60      | 77.77      | 43.58    | 41.88    | 37.60   | 37.60        |         | 17.94         | 12.82         | 12.82               | 15.38    | 20.51           | 15.38           | 10.25        | 15.38      | 23.07     | 69.23       | 17.94       |       |
| CTLV-Kumquat1       | AY646511 | 41.02        | 43.58      | 43.58      | 42.73      | 41.88      | 40.17      | 41.88      | 41.88      | 93.16      | 82.05      | 82.05      | 42.73      | 44.44    | 92.30    | 82.05   | 82.05        | 41.88   |               | 89.74         | 89.74               | 82.05    | 15.38           | 7.69            | 74.35        | 15.38      | 17.94     | 17.94       | 17.94       |       |
| CTLV-LCd-NA-1       | FJ355920 | 39.31        | 42.73      | 42.73      | 41.88      | 41.02      | 37.60      | 41.02      | 41.02      | 100.00     | 85.47      | 85.47      | 40.17      | 45.29    | 97.43    | 85.47   | 85.47        | 41.02   | 93.16         |               | 100.00              | 92.30    | 15.38           | 10.25           | 82.05        | 12.82      | 15.38     | 15.38       | 23.07       |       |
| CTLV-Shatang Orange | JQ765412 | 41.02        | 46.15      | 46.15      | 45.29      | 43.58      | 41.02      | 43.58      | 43.58      | 94.87      | 88.03      | 88.03      | 43.58      | 47.86    | 94.01    | 88.03   | 88.03        | 43.58   | 91.45         | 94.87         |                     | 92.30    | 15.38           | 10.25           | 82.05        | 12.82      | 15.38     | 15.38       | 23.07       |       |
| CTLV-HJY            | MH144341 | 41.02        | 43.58      | 43.58      | 42.73      | 43.58      | 39.31      | 43.58      | 43.58      | 92.30      | 86.32      | 86.32      | 41.02      | 47.00    | 91.45    | 86.32   | 86.32        | 43.58   | 88.88         | 92.30         | 92.30               |          | 17.94           | 10.25           | 79.48        | 12.82      | 15.38     | 17.94       | 23.07       |       |
| CTLV-ASGV-1-HJY     | MH144342 | 41.88        | 41.02      | 41.88      | 41.88      | 41.02      | 39.31      | 41.02      | 41.02      | 37.60      | 37.60      | 37.60      | 41.02      | 40.17    | 37.60    | 37.60   | 37.60        | 41.02   | 41.02         | 37.60         | 42.73               | 41.88    |                 | 12.82           | 15.38        | 15.38      | 17.94     | 23.07       | 23.07       |       |
| CTLV-ASGV-2-HJY     | MH144343 | 56.41        | 41.88      | 41.88      | 42.73      | 41.02      | 41.02      | 41.02      | 41.02      | 39.31      | 35.04      | 35.04      | 41.02      | 71.79    | 41.88    | 35.04   | 35.04        | 41.02   | 43.58         | 39.31         | 40.17               | 41.02    | 40.17           |                 | 7.69         | 23.07      | 17.94     | 12.82       | 74.35       |       |
| ASGV-Matsuco        | LC084659 | 37.60        | 42.73      | 42.73      | 41.88      | 41.02      | 45.29      | 41.02      | 41.02      | 85.47      | 89.74      | 89.74      | 45.29      | 50.42    | 84.61    | 89.74   | 89.74        | 41.02   | 82.05         | 85.47         | 86.32               | 86.32    | 35.89           | 37.60           |              | 17.94      | 23.07     | 20.51       | 17.94       |       |
| ASGV-FKSS2          | LC143387 | 50.42        | 40.17      | 38.46      | 39.31      | 38.46      | 42.73      | 38.46      | 38.46      | 35.04      | 37.60      | 37.60      | 42.73      | 47.00    | 37.60    | 37.60   | 37.60        | 38.46   | 35.04         | 35.04         | 34.18               | 35.89    | 40.17           | 43.58           | 39.31        |            | 82.05     | 20.51       | 25.64       |       |
| ASGV-N297           | LC184610 | 48.71        | 45.29      | 43.58      | 44.44      | 43.58      | 47.86      | 43.58      | 43.58      | 38.46      | 42.73      | 42.73      | 47.86      | 53.84    | 41.02    | 42.73   | 42.73        | 43.58   | 38.46         | 38.46         | 37.60               | 39.31    | 40.17           | 43.58           | 42.73        | 90.59      |           | 28.20       | 28.20       |       |
| ASGV-Kiyomi         | LC184611 | 39.31        | 81.19      | 79.48      | 79.48      | 78.63      | 91.45      | 78.63      | 78.63      | 40.17      | 41.88      | 41.88      | 99.14      | 47.86    | 41.02    | 41.88   | 41.88        | 88.63   | 42.73         | 40.17         | 43.58               | 41.02    | 41.02           | 41.88           | 45.29        | 41.88      | 47.00     |             | 20.51       |       |
| ASGV-Nagami         | LC184612 | 54.70        | 43.58      | 43.58      | 44.44      | 42.73      | 45.29      | 42.73      | 42.73      | 44.44      | 43.58      | 43.58      | 45.29      | 75.21    | 47.00    | 43.58   | 43.58        | 42.73   | 47.00         | 44.44         | 45.29               | 46.15    | 41.02           | 86.32           | 44.44        | 45.29      | 48.71     | 46.15       |             |       |

CTLV: citrus tatter leaf virus; ASGV: apple stem grooving virus
