# Supplementary material for: Full genome characterization of 12 citrus tatter leaf virus isolates for the development of a detection assay
Source: PubMed Central journal article supplement (PMC6797102; doi:10.1371/journal.pone.0223958), 2019-10-17
Supplement: pone.0223958.s008.pdf [file pone.0223958.s008.pdf]

**S7 Table. Nucleotide (below diagonal) and amino acid (above diagonal) sequences identities (%) of variable region II (VRII) of citrus tatter leaf virus and apple stem grooving virus isolated from citrus and citrus re**

| Isolate             | GenBank  | CTLV-IPP122 | CTLV-TL100 | CTLV-TL101 | CTLV-TL102 | CTLV-TL103 | CTLV-TL104 | CTLV-TL110 | CTLV-TL111 | CTLV-TL112 | CTLV-TL113 | CTLV-TL114 | CTLV-TL115 | CTLV-MTH | CTLV-XHC | CTLV-Pk | CTLV-Ponkan8 | CTLV-ML | CTLV-Kumquat1 | CTLV-LCd-NA-1 | CTLV-Shatang Orange | CTLV-HJY | CTLV-ASGV-1-HJY | CTLV-ASGV-2-HJY | ASGV-Matsuco | ASGV-FKSS2 | ASGV-N297 | ASGV-Kiyomi | ASGV-Nagami |       |
|---------------------|----------|-------------|------------|------------|------------|------------|------------|------------|------------|------------|------------|------------|------------|----------|----------|---------|--------------|---------|---------------|---------------|---------------------|----------|-----------------|-----------------|--------------|------------|-----------|-------------|-------------|-------|
| CTLV-IPP122         | MH108986 |             | 58.74      | 59.44      | 59.79      | 59.79      | 62.58      | 59.79      | 59.79      | 57.69      | 56.64      | 57.69      | 60.13      | 62.93    | 53.84    | 56.64   | 56.64        | 59.79   | 57.69         | 57.69         | 56.64               | 56.29    | 56.99           | 71.67           | 54.19        | 57.34      | 56.64     | 61.18       | 63.28       |       |
| CTLV-TL100          | MH108975 | 84.26       |            | 96.50      | 95.10      | 95.45      | 82.51      | 95.45      | 95.45      | 66.78      | 63.28      | 62.58      | 80.41      | 58.39    | 61.53    | 63.28   | 63.28        | 95.45   | 62.58         | 66.78         | 62.93               | 62.93    | 61.53           | 56.64           | 63.98        | 60.13      | 59.09     | 81.46       | 59.79       |       |
| CTLV-TL101          | MH108976 | 84.73       | 98.71      |            | 97.20      | 96.85      | 83.56      | 96.85      | 96.85      | 65.73      | 62.23      | 62.23      | 80.76      | 57.69    | 60.13    | 62.23   | 62.23        | 96.85   | 62.23         | 65.73         | 62.58               | 61.88    | 61.18           | 56.29           | 62.93        | 59.44      | 58.74     | 82.51       | 59.44       |       |
| CTLV-TL102          | MH108977 | 84.61       | 98.25      | 98.83      |            | 95.45      | 83.56      | 95.45      | 95.45      | 64.33      | 61.53      | 62.93      | 81.46      | 56.99    | 60.13    | 61.53   | 61.53        | 95.45   | 62.93         | 64.33         | 62.58               | 61.88    | 61.18           | 56.99           | 62.23        | 59.44      | 57.34     | 82.51       | 58.74       |       |
| CTLV-TL103          | MH108978 | 84.61       | 98.48      | 98.83      | 98.36      |            | 84.61      | 100.00     | 100.00     | 66.43      | 63.63      | 62.93      | 82.51      | 58.39    | 61.53    | 63.63   | 63.63        | 100.00  | 62.93         | 66.43         | 63.98               | 63.28    | 60.83           | 56.99           | 65.03        | 60.13      | 58.74     | 84.26       | 61.53       |       |
| CTLV-TL104          | MH108979 | 86.01       | 93.70      | 94.05      | 94.05      | 94.52      |            | 84.61      | 84.61      | 61.18      | 58.74      | 59.79      | 90.90      | 60.13    | 57.34    | 58.74   | 58.74        | 84.61   | 59.79         | 61.18         | 60.13               | 60.13    | 64.68           | 60.13           | 60.13        | 59.79      | 57.69     | 92.65       | 61.53       |       |
| CTLV-TL110          | MH108980 | 84.61       | 98.48      | 98.83      | 98.36      | 100.00     | 94.52      |            | 100.00     | 66.43      | 63.63      | 62.93      | 82.51      | 58.39    | 61.53    | 63.63   | 63.63        | 100.00  | 62.93         | 66.43         | 63.98               | 63.28    | 60.83           | 56.99           | 65.03        | 60.13      | 58.74     | 84.26       | 61.53       |       |
| CTLV-TL111          | MH108981 | 84.61       | 98.48      | 98.83      | 98.36      | 100.00     | 94.52      | 100.00     |            | 66.43      | 63.63      | 62.93      | 82.51      | 58.39    | 61.53    | 63.63   | 63.63        | 100.00  | 62.93         | 66.43         | 63.98               | 63.28    | 60.83           | 56.99           | 65.03        | 60.13      | 58.74     | 84.26       | 61.53       |       |
| CTLV-TL112          | MH108982 | 84.38       | 87.52      | 87.06      | 86.59      | 87.29      | 85.66      | 87.29      | 87.29      |            | 87.41      | 86.36      | 60.13      | 55.59    | 84.61    | 87.41   | 87.41        | 66.43   | 86.36         | 100.00        | 88.11               | 86.71    | 55.94           | 55.24           | 89.16        | 53.49      | 52.44     | 61.53       | 59.44       |       |
| CTLV-TL113          | MH108983 | 84.03       | 86.24      | 85.78      | 85.54      | 86.24      | 84.96      | 86.24      | 86.24      | 95.22      |            | 84.96      | 58.39      | 55.59    | 82.16    | 100.00  | 100.00       | 63.63   | 84.96         | 87.41         | 85.31               | 83.56    | 55.59           | 55.24           | 90.55        | 55.59      | 53.84     | 57.69       | 56.64       |       |
| CTLV-TL114          | MH108984 | 84.14       | 85.66      | 85.43      | 85.66      | 85.66      | 84.96      | 85.66      | 85.66      | 94.87      | 94.75      |            | 61.18      | 56.99    | 93.00    | 84.96   | 84.96        | 62.93   | 100.00        | 86.36         | 96.85               | 92.65    | 57.34           | 55.24           | 84.61        | 56.29      | 55.24     | 60.48       | 58.04       |       |
| CTLV-TL115          | MH108985 | 84.96       | 93.00      | 93.12      | 93.35      | 93.82      | 96.73      | 93.82      | 93.82      | 85.08      | 84.61      | 85.31      |            | 60.83    | 59.79    | 58.39   | 58.39        | 82.51   | 61.18         | 60.13         | 61.88               | 61.88    | 63.63           | 57.69           | 61.18        | 59.44      | 57.34     | 96.15       | 61.88       |       |
| CTLV-MTH            | KC588948 | 85.89       | 84.14      | 83.79      | 83.56      | 84.03      | 84.96      | 84.03      | 84.03      | 83.56      | 83.91      | 84.38      | 84.96      |          | 55.94    | 55.59   | 55.59        | 58.39   | 56.99         | 55.59         | 56.99               | 56.64    | 55.94           | 70.27           | 55.94        | 59.79      | 57.69     | 60.48       | 79.02       |       |
| CTLV-XHC            | KC588947 | 82.86       | 85.19      | 84.73      | 84.73      | 85.19      | 84.03      | 85.19      | 85.19      | 94.17      | 93.47      | 97.31      | 84.61      | 83.44    |          | 82.16   | 82.16        | 61.53   | 93.00         | 84.61         | 94.75               | 91.95    | 58.04           | 53.14           | 84.61        | 53.49      | 53.14     | 59.09       | 55.94       |       |
| CTLV-Pk             | JX416228 | 84.03       | 86.24      | 85.78      | 85.54      | 86.24      | 84.96      | 86.24      | 86.24      | 95.22      | 100.00     | 94.75      | 84.61      | 83.91    | 93.47    |         | 100.00       | 63.63   | 84.96         | 87.41         | 85.31               | 83.56    | 55.59           | 55.24           | 90.55        | 55.59      | 53.84     | 57.69       | 56.64       |       |
| CTLV-Ponkan8        | KY706358 | 84.03       | 86.24      | 85.78      | 85.54      | 86.24      | 84.96      | 86.24      | 86.24      | 95.22      | 100.00     | 94.75      | 84.61      | 83.91    | 93.47    | 100.00  |              | 63.63   | 84.96         | 87.41         | 85.31               | 83.56    | 55.59           | 55.24           | 90.55        | 55.59      | 53.84     | 57.69       | 56.64       |       |
| CTLV-ML             | EU553489 | 84.61       | 98.48      | 98.83      | 98.36      | 100.00     | 94.52      | 100.00     | 100.00     | 87.29      | 86.24      | 85.66      | 93.82      | 84.03    | 85.19    | 86.24   | 86.24        |         | 62.93         | 66.43         | 63.98               | 63.28    | 60.83           | 56.99           | 65.03        | 60.13      | 58.74     | 84.26       | 61.53       |       |
| CTLV-Kumquat1       | AY646511 | 84.14       | 85.66      | 85.43      | 85.66      | 85.66      | 84.96      | 85.66      | 85.66      | 94.87      | 94.75      | 100.00     | 85.31      | 84.38    | 97.31    | 94.75   | 94.75        | 85.66   |               | 86.36         | 96.85               | 92.65    | 57.34           | 55.24           | 84.61        | 56.29      | 55.24     | 60.48       | 58.04       |       |
| CTLV-LCd-NA-1       | FJ355920 | 84.38       | 87.52      | 87.06      | 86.59      | 87.29      | 85.66      | 87.29      | 87.29      | 100.00     | 95.22      | 94.87      | 85.08      | 83.56    | 94.17    | 95.22   | 95.22        | 87.29   | 94.87         |               | 88.11               | 86.71    | 55.94           | 55.24           | 89.16        | 53.49      | 52.44     | 61.53       | 59.44       |       |
| CTLV-Shatang Orange | JQ765412 | 83.79       | 85.54      | 85.31      | 85.31      | 85.78      | 84.84      | 85.78      | 85.78      | 95.33      | 94.52      | 98.60      | 85.19      | 84.03    | 97.78    | 94.52   | 94.52        | 85.78   | 98.60         | 95.33         |                     | 94.40    | 57.34           | 53.14           | 87.06        | 55.24      | 54.54     | 61.18       | 58.04       |       |
| CTLV-HJY            | MH144341 | 83.68       | 85.78      | 85.31      | 85.31      | 85.78      | 85.08      | 85.78      | 85.78      | 94.87      | 94.17      | 97.43      | 85.43      | 84.14    | 96.85    | 94.17   | 94.17        | 85.78   | 97.43         | 94.87         | 97.66               |          | 55.94           | 54.19           | 85.31        | 55.59      | 54.19     | 61.18       | 57.69       |       |
| CTLV-ASGV-1-HJY     | MH144342 | 83.33       | 85.66      | 85.54      | 85.54      | 85.54      | 87.06      | 85.54      | 85.54      | 83.44      | 83.68      | 84.26      | 86.48      | 83.33    | 84.26    | 83.68   | 83.68        | 85.54   | 84.26         | 83.44         | 83.91               | 83.68    |                 | 55.94           | 56.64        | 56.29      | 57.69     | 64.33       | 56.99       |       |
| CTLV-ASGV-2-HJY     | MH144343 | 88.69       | 83.21      | 82.86      | 83.10      | 83.10      | 84.73      | 83.10      | 83.10      | 82.86      | 83.21      | 83.21      | 83.68      | 89.27    | 82.05    | 83.21   | 83.21        | 83.10   | 83.21         | 82.86         | 82.40               | 82.98    | 82.98           |                 | 54.19        | 60.48      | 59.44     | 58.74       | 74.82       |       |
| ASGV-Matsuco        | LC084659 | 83.21       | 86.36      | 85.89      | 85.66      | 86.59      | 85.31      | 86.59      | 86.59      | 95.92      | 96.73      | 94.75      | 85.43      | 83.91    | 94.40    | 96.73   | 96.73        | 86.59   | 94.75         | 95.92         | 95.22               | 94.87    | 83.91           | 82.75           |              | 53.14      | 53.49     | 60.48       | 57.34       |       |
| ASGV-FKSS2          | LC143387 | 84.14       | 85.08      | 84.73      | 84.73      | 84.96      | 84.84      | 84.96      | 84.96      | 82.75      | 83.79      | 83.79      | 84.49      | 85.08    | 82.63    | 83.79   | 83.79        | 84.96   | 83.79         | 82.75         | 83.10               | 83.44    | 83.56           | 85.31           | 82.86        |            | 87.76     | 59.79       | 58.39       |       |
| ASGV-N297           | LC184610 | 83.68       | 84.84      | 84.49      | 84.03      | 84.49      | 84.38      | 84.49      | 84.49      | 82.75      | 83.56      | 83.68      | 84.03      | 84.49    | 82.75    | 83.56   | 84.49        | 83.68   | 84.49         | 83.68         | 82.75               | 83.21    | 83.33           | 84.49           | 85.08        | 83.33      | 95.57     |             | 56.99       | 59.09 |
| ASGV-Kiyomi         | LC184611 | 85.43       | 93.47      | 93.82      | 93.82      | 94.52      | 97.43      | 94.52      | 94.52      | 85.66      | 84.49      | 85.19      | 98.60      | 84.96    | 84.49    | 84.49   | 84.49        | 84.49   | 94.52         | 85.19         | 85.66               | 85.08    | 85.31           | 86.82           | 84.14        | 85.31      | 84.73     | 84.03       |             | 62.23 |
| ASGV-Nagami         | LC184612 | 86.13       | 84.61      | 84.26      | 84.03      | 84.96      | 85.43      | 84.96      | 84.96      | 84.49      | 83.91      | 84.14      | 85.19      | 92.30    | 82.98    | 83.91   | 83.91        | 84.96   | 84.14         | 84.49         | 84.03               | 83.91    | 83.44           | 90.90           | 84.03        | 84.96      | 85.08     | 85.43       |             |       |

CTLV: citrus tatter leaf virus; ASGV: apple stem grooving virus
