# Supplementary material for: Full genome characterization of 12 citrus tatter leaf virus isolates for the development of a detection assay
Source: PubMed Central journal article supplement (PMC6797102; doi:10.1371/journal.pone.0223958), 2019-10-17
Supplement: pone.0223958.s009.pdf [file pone.0223958.s009.pdf]

**S8 Table. Nucleotide (below diagonal) and amino acid (above diagonal) sequence identities (%) of polyprotein (PP).**

| Isolate             | Genbank Accession No. | CTLV-IPPN122 | CTLV-TL100 | CTLV-TL101 | CTLV-TL102 | CTLV-TL103 | CTLV-TL104 | CTLV-TL110 | CTLV-TL111 | CTLV-TL113 | CTLV-TL114 | CTLV-TL115 | CTLV-MTH | CTLV-XHC | CTLV-Pk | CTLV-Ponkan8 | CTLV-ML | CTLV-Kumquat1 | CTLV-LcDNA-1 | CTLV-Shatang Orange | CTLV-HJY | CTLV-ASGV-1HJY | CTLV-ASGV-2HJY | CTLV-L | ASGV-Li-23 | ASGV-P-209 | ASGV-p12 | ASGV-AC | ASGV-HH | ASGV-241KP | ASGV-Matsuo | ASGV-FKSS2 | ASGV-N297 | ASGV-Kiyomi | ASGV-Nagami | ASGV-kfp | ASGV-AC | ASGV-CHN | ASGV-YTG | ASGV-YTG | ASGV-HT | PBNLSV |
|---------------------|-----------------------|--------------|------------|------------|------------|------------|------------|------------|------------|------------|------------|------------|----------|----------|---------|--------------|---------|---------------|--------------|---------------------|----------|----------------|----------------|--------|------------|------------|----------|---------|---------|------------|-------------|------------|-----------|-------------|-------------|----------|---------|----------|----------|----------|---------|--------|
| CTLV-IPPN122        | MH108986              | 86.24        | 86.34      | 86.29      | 86.13      | 86.83      | 86.13      | 86.13      | 86.02      | 86.13      | 86.34      | 86.18      | 89.40    | 84.95    | 86.08   | 86.08        | 86.13   | 85.81         | 85.97        | 85.65               | 85.76    | 86.88          | 90.73          | 86.08  | 85.76      | 89.66      | 82.55    | 85.59   | 87.68   | 89.66      | 85.81       | 87.52      | 87.04     | 86.24       | 89.77       | 83.46    | 86.67   | 86.88    | 87.09    | 84.47    | 84.20   |        |
| CTLV-TL100          | MH108975              | 80.62        | 99.25      | 98.92      | 98.66      | 94.27      | 98.66      | 94.27      | 98.66      | 87.04      | 86.34      | 86.40      | 93.73    | 86.24    | 85.81   | 86.40        | 86.40   | 98.66         | 86.45        | 86.99               | 86.24    | 86.61          | 87.20          | 86.18  | 85.49      | 85.27      | 86.40    | 83.62   | 86.40   | 86.40      | 86.40       | 86.72      | 86.61     | 86.93       | 94.00       | 86.99    | 84.00   | 86.13    | 85.43    | 85.86    | 83.88   | 84.36  |
| CTLV-TL101          | MH108976              | 80.71        | 98.89      | 99.25      | 98.98      | 94.43      | 98.98      | 98.98      | 98.98      | 86.88      | 86.34      | 86.50      | 93.79    | 86.13    | 85.70   | 86.40        | 86.40   | 98.98         | 86.50        | 86.83               | 86.24    | 86.45          | 87.20          | 86.13  | 85.38      | 85.11      | 86.18    | 83.57   | 86.24   | 86.34      | 86.18       | 86.61      | 86.40     | 86.77       | 94.16       | 86.93    | 83.95   | 86.02    | 85.38    | 85.70    | 83.88   | 84.20  |
| CTLV-TL102          | MH108977              | 80.67        | 98.60      | 98.85      | 98.55      | 94.21      | 98.55      | 98.55      | 98.55      | 86.56      | 85.97      | 86.34      | 93.68    | 85.86    | 85.49   | 86.02        | 86.02   | 98.55         | 86.40        | 86.50               | 86.08    | 86.34          | 87.20          | 86.29  | 85.33      | 85.05      | 86.13    | 83.46   | 86.13   | 86.29      | 86.13       | 86.29      | 86.34     | 86.50       | 93.95       | 86.88    | 83.79   | 85.86    | 85.33    | 85.70    | 83.72   | 84.15  |
| CTLV-TL103          | MH108978              | 80.67        | 98.41      | 98.62      | 98.26      | 94.27      | 100.00     | 100.00     | 100.00     | 86.72      | 86.24      | 86.29      | 93.73    | 85.97    | 85.65   | 86.29        | 86.29   | 100.00        | 86.34        | 86.67               | 86.18    | 86.40          | 86.77          | 86.08  | 85.38      | 85.01      | 86.24    | 83.41   | 86.08   | 86.02      | 86.24       | 86.67      | 86.34     | 86.56       | 94.11       | 87.09    | 83.68   | 85.92    | 85.06    | 85.49    | 83.77   | 84.04  |
| CTLV-TL104          | MH108979              | 80.38        | 92.02      | 92.32      | 92.09      | 91.97      | 94.27      | 94.27      | 94.27      | 86.18      | 86.24      | 86.24      | 97.05    | 86.61    | 85.27   | 86.29        | 86.29   | 94.27         | 86.13        | 86.13               | 85.92    | 86.24          | 87.68          | 86.67  | 85.22      | 84.74      | 86.61    | 83.57   | 86.24   | 86.08      | 86.61       | 86.29      | 86.83     | 86.72       | 97.37       | 87.36    | 84.16   | 86.13    | 86.18    | 85.81    | 83.99   | 84.10  |
| CTLV-TL110          | MH108980              | 80.67        | 98.41      | 98.62      | 98.26      | 100.00     | 100.00     | 100.00     | 100.00     | 86.72      | 86.24      | 86.29      | 93.73    | 85.97    | 85.65   | 86.29        | 86.29   | 100.00        | 86.34        | 86.67               | 86.18    | 86.40          | 86.77          | 86.08  | 85.38      | 85.01      | 86.24    | 83.41   | 86.08   | 86.02      | 86.24       | 86.67      | 86.34     | 86.56       | 94.11       | 87.09    | 83.68   | 85.92    | 85.06    | 85.49    | 83.77   | 84.04  |
| CTLV-TL111          | MH108981              | 80.67        | 98.41      | 98.62      | 98.26      | 100.00     | 100.00     | 100.00     | 100.00     | 86.72      | 86.24      | 86.29      | 93.73    | 85.97    | 85.65   | 86.29        | 86.29   | 100.00        | 86.34        | 86.67               | 86.18    | 86.40          | 86.77          | 86.08  | 85.38      | 85.01      | 86.24    | 83.41   | 86.08   | 86.02      | 86.24       | 86.67      | 86.34     | 86.56       | 94.11       | 87.09    | 83.68   | 85.92    | 85.06    | 85.49    | 83.77   | 84.04  |
| CTLV-TL112          | MH108982              | 79.69        | 80.65      | 80.56      | 80.44      | 80.56      | 80.29      | 80.56      | 80.56      | 95.93      | 95.44      | 86.13      | 86.18    | 95.61    | 95.77   | 95.77        | 100.00  | 86.29         | 94.96        | 95.71               | 95.28    | 95.18          | 85.81          | 86.18  | 85.97      | 85.49      | 86.77    | 84.59   | 87.15   | 85.97      | 86.77       | 96.46      | 86.24     | 86.18       | 85.92       | 86.88    | 84.38   | 85.81    | 85.59    | 86.24    | 84.20   | 84.42  |
| CTLV-TL113          | MH108983              | 79.55        | 80.76      | 80.69      | 80.62      | 80.65      | 80.69      | 80.65      | 80.65      | 94.09      | 96.84      | 86.13      | 86.50    | 94.59    | 99.83   | 99.83        | 100.00  | 86.29         | 94.96        | 95.71               | 95.28    | 95.18          | 85.81          | 86.18  | 85.97      | 85.49      | 86.77    | 84.59   | 87.15   | 85.97      | 86.77       | 96.46      | 86.24     | 86.18       | 85.92       | 86.88    | 84.38   | 85.81    | 85.59    | 86.24    | 84.20   | 84.42  |
| CTLV-TL114          | MH108984              | 79.90        | 80.65      | 80.65      | 80.54      | 80.54      | 80.96      | 80.54      | 80.54      | 92.80      | 96.25      | 86.40      | 86.77    | 96.25    | 96.68   | 96.68        | 100.00  | 86.29         | 94.96        | 95.71               | 95.28    | 95.18          | 85.81          | 86.18  | 85.97      | 85.49      | 86.77    | 84.59   | 87.15   | 85.97      | 86.77       | 96.46      | 86.24     | 86.18       | 85.92       | 86.88    | 84.38   | 85.81    | 85.59    | 86.24    | 84.20   | 84.42  |
| CTLV-TL115          | MH108985              | 80.13        | 91.59      | 91.70      | 91.55      | 91.39      | 95.37      | 91.39      | 91.39      | 80.29      | 80.71      | 81.08      | 86.67    | 85.76    | 96.68   | 96.68        | 100.00  | 86.29         | 94.96        | 95.71               | 95.28    | 95.18          | 85.81          | 86.18  | 85.97      | 85.49      | 86.77    | 84.59   | 87.15   | 85.97      | 86.77       | 96.46      | 86.24     | 86.18       | 85.92       | 86.88    | 84.38   | 85.81    | 85.59    | 86.24    | 84.20   | 84.42  |
| CTLV-MTH            | KC588948              | 85.01        | 80.65      | 80.58      | 80.44      | 80.53      | 80.88      | 80.53      | 80.53      | 80.58      | 80.54      | 81.06      | 80.79    | 85.76    | 86.56   | 86.56        | 100.00  | 86.29         | 94.96        | 95.71               | 95.28    | 95.18          | 85.81          | 86.18  | 85.97      | 85.49      | 86.77    | 84.59   | 87.15   | 85.97      | 86.77       | 96.46      | 86.24     | 86.18       | 85.92       | 86.88    | 84.38   | 85.81    | 85.59    | 86.24    | 84.20   | 84.42  |
| CTLV-XHC            | KC588947              | 79.24        | 80.04      | 79.99      | 79.99      | 80.06      | 79.99      | 80.06      | 80.06      | 94.84      | 93.20      | 94.27      | 80.28    | 80.31    | 94.53   | 94.53        | 100.00  | 86.29         | 94.96        | 95.71               | 95.28    | 95.18          | 85.81          | 86.18  | 85.97      | 85.49      | 86.77    | 84.59   | 87.15   | 85.97      | 86.77       | 96.46      | 86.24     | 86.18       | 85.92       | 86.88    | 84.38   | 85.81    | 85.59    | 86.24    | 84.20   | 84.42  |
| CTLV-Pk             | JX416228              | 79.47        | 80.63      | 80.56      | 80.49      | 80.53      | 80.63      | 80.53      | 80.53      | 93.54      | 99.37      | 96.09      | 80.69    | 80.62    | 93.29   | 100.00       | 100.00  | 86.29         | 94.96        | 95.71               | 95.28    | 95.18          | 85.81          | 86.18  | 85.97      | 85.49      | 86.77    | 84.59   | 87.15   | 85.97      | 86.77       | 96.46      | 86.24     | 86.18       | 85.92       | 86.88    | 84.38   | 85.81    | 85.59    | 86.24    | 84.20   | 84.42  |
| CTLV-Ponkan8        | KY706358              | 79.47        | 80.63      | 80.56      | 80.49      | 80.53      | 80.63      | 80.53      | 80.53      | 93.54      | 99.37      | 96.09      | 80.69    | 80.62    | 93.29   | 100.00       | 100.00  | 86.29         | 94.96        | 95.71               | 95.28    | 95.18          | 85.81          | 86.18  | 85.97      | 85.49      | 86.77    | 84.59   | 87.15   | 85.97      | 86.77       | 96.46      | 86.24     | 86.18       | 85.92       | 86.88    | 84.38   | 85.81    | 85.59    | 86.24    | 84.20   | 84.42  |
| CTLV-L              | EUS53489              | 80.67        | 98.41      | 98.62      | 98.26      | 100.00     | 100.00     | 100.00     | 100.00     | 80.56      | 80.65      | 80.54      | 91.39    | 80.53    | 80.06   | 80.53        | 80.53   | 86.34         | 86.67        | 86.18               | 86.40    | 86.77          | 86.08          | 85.38  | 85.01      | 86.24      | 83.41    | 86.08   | 86.02   | 86.24      | 86.67       | 86.34      | 86.56     | 94.11       | 87.09       | 83.68    | 85.92   | 85.06    | 85.49    | 83.77    | 84.04   |        |
| CTLV-Kumquat1       | AY646511              | 79.74        | 80.53      | 80.51      | 80.53      | 80.49      | 80.47      | 80.49      | 80.49      | 94.71      | 93.41      | 94.84      | 80.72    | 80.81    | 97.50   | 93.50        | 93.50   | 80.49         | 96.09        | 98.28               | 97.37    | 85.54          | 85.81          | 85.59  | 85.22      | 86.99      | 84.54    | 87.15   | 85.43   | 86.99      | 94.91       | 86.24      | 86.02     | 86.18       | 86.56       | 83.73    | 86.13   | 84.58    | 86.02    | 83.29    | 84.52   |        |
| CTLV-LcDNA-1        | FJ355920              | 79.62        | 80.65      | 80.56      | 80.44      | 80.56      | 80.26      | 80.56      | 80.56      | 99.85      | 94.16      | 92.80      | 80.29    | 80.44    | 94.84   | 93.54        | 93.54   | 80.56         | 94.71        | 96.52               | 96.41    | 85.59          | 86.08          | 85.17  | 84.79      | 86.88      | 84.59    | 87.31   | 85.59   | 86.88      | 96.03       | 85.97      | 85.86     | 86.13       | 87.09       | 83.68    | 86.24   | 84.74    | 86.13    | 84.20    | 84.36   |        |
| CTLV-Shatang Orange | JQ765412              | 79.81        | 80.29      | 80.24      | 80.26      | 80.33      | 80.19      | 80.33      | 80.33      | 94.98      | 93.70      | 94.68      | 80.47    | 80.74    | 97.93   | 93.71        | 93.71   | 80.33         | 97.91        | 94.98               | 98.01    | 85.54          | 85.54          | 85.43  | 85.01      | 86.93      | 84.54    | 86.99   | 85.49   | 86.93      | 95.55       | 86.02      | 85.92     | 86.02       | 86.67       | 83.68    | 86.34   | 84.63    | 85.92    | 83.40    | 84.58   |        |
| CTLV-HJY            | MH144341              | 79.67        | 80.53      | 80.40      | 80.47      | 80.54      | 80.28      | 80.54      | 80.54      | 94.45      | 93.30      | 94.11      | 80.51    | 80.67    | 96.98   | 93.39        | 93.39   | 80.54         | 96.93        | 94.48               | 97.32    | 85.70          | 85.86          | 85.33  | 84.95      | 87.15      | 84.59    | 87.04   | 85.49   | 87.15      | 95.50       | 86.18      | 86.02     | 86.29       | 86.88       | 84.27    | 86.56   | 84.90    | 85.81    | 83.77    | 84.79   |        |
| CTLV-ASGV-1-HJY     | MH144342              | 80.74        | 80.58      | 80.53      | 80.51      | 80.44      | 81.42      | 80.44      | 80.44      | 79.37      | 79.47      | 79.87      | 81.12    | 80.67    | 79.28   | 79.49        | 79.49   | 80.44         | 79.37        | 79.37               | 79.42    | 79.49          | 87.04          | 85.43  | 85.11      | 86.99      | 83.68    | 87.04   | 86.02   | 86.99      | 85.76       | 86.29      | 86.67     | 87.52       | 87.36       | 85.02    | 86.93   | 85.81    | 86.24    | 84.20    | 85.01   |        |
| CTLV-ASGV-2-HJY     | MH144343              | 85.47        | 79.99      | 79.80      | 79.94      | 79.80      | 80.31      | 79.80      | 79.80      | 80.17      | 80.19      | 80.49      | 79.96    | 89.82    | 79.69   | 80.19        | 80.19   | 79.80         | 80.21        | 80.03               | 79.94    | 80.08          | 80.83          | 86.77  | 86.50      | 93.68      | 83.09    | 86.18   | 89.29   | 93.68      | 86.02       | 88.49      | 88.27     | 86.13       | 94.27       | 84.11    | 86.50   | 89.02    | 88.06    | 84.15    | 84.90   |        |
| CTLV-L              | D16681                | 81.56        | 79.65      | 79.58      | 79.63      | 79.69      | 79.49      | 79.69      | 79.69      | 79.69      | 79.96      | 79.90      | 79.65    | 81.56    | 79.30   | 80.04        | 80.04   | 79.69         | 79.76        | 79.65               | 79.53    | 79.46          | 80.35          | 81.26  | 97.80      | 87.25      | 82.66    | 85.43   | 88.06   | 87.25      | 85.27       | 95.07      | 94.75     | 85.38       | 86.72       | 82.92    | 84.79   | 87.15    | 85.38    | 83.56    | 82.76   |        |
| ASGV-Li-23          | AB004063              | 81.53        | 79.55      | 79.47      | 79.53      | 79.55      | 79.38      | 79.55      | 79.55      | 79.71      | 79.92      | 79.85      | 79.40    | 81.37    | 79.24   | 80.01        | 80.01   | 79.55         | 79.65        | 79.67               | 79       |                |                |        |            |            |          |         |         |            |             |            |           |             |             |          |         |          |          |          |         |        |
