# Supplementary material for: Full genome characterization of 12 citrus tatter leaf virus isolates for the development of a detection assay
Source: PubMed Central journal article supplement (PMC6797102; doi:10.1371/journal.pone.0223958), 2019-10-17
Supplement: pone.0223958.s010.pdf [file pone.0223958.s010.pdf]

S9 Table. Nucleotide (below diagonal) and amino acid (above diagonal) sequence identities (%) of coat protein (CP).

| Isolate             | Genbank Accession No. | CTLV-V-IPPN122 | CTLV-V-TL100 | CTLV-V-TL101 | CTLV-V-TL102 | CTLV-V-TL103 | CTLV-V-TL104 | CTLV-V-TL110 | CTLV-V-TL111 | CTLV-V-TL112 | CTLV-V-TL113 | CTLV-V-TL114 | CTLV-V-TL115 | CTLV-V-CLdNA-1 | CTLV-V-Shatang Orange | CTLV-V-HJY | CTLV-V-ASGV-1-HJY | CTLV-V-ASGV-2-HJY | CTLV-V-1 | ASGV-V-Li-23 | ASGV-V-P-209 | ASGV-V-p12 | ASGV-V-AC | ASGV-V-HH | ASGV-V-241KP | ASGV-V-Matsuo | ASGV-V-FKSS2 | ASGV-V-N297 | ASGV-V-Kiyomi | ASGV-V-Nagami | ASGV-V-kfp | ASGV-V-Ac | ASGV-V-CHN | ASGV-V-YTG | ASGV-V-HT | PBNLSV |       |       |       |       |       |       |
|---------------------|-----------------------|----------------|--------------|--------------|--------------|--------------|--------------|--------------|--------------|--------------|--------------|--------------|--------------|----------------|-----------------------|------------|-------------------|-------------------|----------|--------------|--------------|------------|-----------|-----------|--------------|---------------|--------------|-------------|---------------|---------------|------------|-----------|------------|------------|-----------|--------|-------|-------|-------|-------|-------|-------|
| CTLV-IPPN122        | MH108986              | 94.53          | 94.95        | 96.21        | 94.95        | 95.37        | 94.95        | 94.95        | 94.95        | 94.95        | 94.95        | 94.95        | 98.73        | 94.11          | 94.95                 | 94.95      | 94.95             | 94.95             | 94.95    | 96.21        | 94.53        | 95.37      | 93.69     | 100.00    | 97.47        | 97.47         | 96.63        | 97.47       | 97.05         | 97.05         | 96.63      | 94.53     | 97.05      | 96.63      | 95.37     | 96.21  | 94.53 | 97.05 | 96.63 | 97.47 | 95.37 | 94.95 |
| CTLV-TL100          | MH108975              | 91.31          | 99.57        | 97.05        | 99.57        | 97.89        | 99.57        | 99.57        | 95.37        | 92.01        | 93.69        | 97.05        | 94.53        | 92.43          | 92.01                 | 92.01      | 99.57             | 93.69             | 94.11    | 92.85        | 93.69        | 93.27      | 94.53     | 95.79     | 95.79        | 94.11         | 95.37        | 95.37       | 95.37         | 94.11         | 93.69      | 95.37     | 95.79      | 97.89      | 94.11     | 94.53  | 94.11 | 95.37 | 96.63 | 94.53 | 94.95 |       |
| CTLV-TL101          | MH108976              | 91.59          | 99.71        | 97.47        | 100.00       | 98.31        | 100.00       | 100.00       | 95.79        | 92.01        | 94.11        | 97.47        | 94.95        | 92.85          | 92.01                 | 92.01      | 100.00            | 94.11             | 94.53    | 93.27        | 94.11        | 93.69      | 94.95     | 96.21     | 96.21        | 94.53         | 95.79        | 95.79       | 95.79         | 94.53         | 93.69      | 95.79     | 96.21      | 98.31      | 94.53     | 94.95  | 94.53 | 94.95 | 97.05 | 94.95 | 95.37 |       |
| CTLV-TL102          | MH108977              | 93.27          | 96.63        | 96.91        | 97.47        | 97.05        | 97.47        | 97.47        | 98.31        | 93.27        | 95.37        | 97.05        | 95.79        | 94.11          | 93.27                 | 97.47      | 95.37             | 95.79             | 94.53    | 95.37        | 94.11        | 96.21      | 97.05     | 97.05     | 95.79        | 97.05         | 96.63        | 96.63       | 95.79         | 94.95         | 97.05      | 96.63     | 97.05      | 96.21      | 94.95     | 95.37  | 96.21 | 97.89 | 95.79 | 96.21 |       |       |
| CTLV-TL103          | MH108978              | 91.59          | 99.15        | 99.43        | 96.35        | 98.31        | 100.00       | 100.00       | 95.79        | 92.01        | 94.11        | 97.47        | 94.95        | 92.85          | 92.01                 | 92.01      | 100.00            | 94.11             | 94.53    | 93.27        | 94.11        | 93.69      | 94.95     | 96.21     | 96.21        | 94.53         | 95.79        | 95.79       | 95.79         | 94.53         | 93.69      | 95.79     | 96.21      | 98.31      | 94.53     | 94.95  | 94.53 | 94.95 | 97.05 | 94.95 | 95.37 |       |
| CTLV-TL104          | MH108979              | 91.87          | 96.49        | 96.77        | 95.37        | 96.21        | 98.31        | 98.31        | 95.37        | 92.01        | 94.11        | 99.15        | 94.53        | 92.85          | 92.01                 | 92.01      | 98.31             | 94.11             | 94.95    | 93.27        | 94.11        | 94.11      | 95.37     | 96.63     | 96.63        | 94.95         | 96.21        | 96.21       | 96.21         | 94.95         | 93.69      | 96.21     | 96.63      | 100.00     | 95.79     | 95.37  | 94.95 | 95.37 | 97.47 | 95.37 | 95.79 |       |
| CTLV-TL110          | MH108980              | 91.59          | 99.15        | 99.43        | 96.35        | 100.00       | 96.21        | 100.00       | 95.79        | 92.01        | 94.11        | 97.47        | 94.95        | 92.85          | 92.01                 | 92.01      | 100.00            | 94.11             | 94.53    | 93.27        | 94.11        | 93.69      | 94.95     | 96.21     | 96.21        | 94.53         | 95.79        | 95.79       | 95.79         | 94.53         | 93.69      | 95.79     | 96.21      | 98.31      | 94.53     | 94.95  | 94.53 | 94.95 | 97.05 | 94.95 | 95.37 |       |
| CTLV-TL111          | MH108981              | 91.59          | 99.15        | 99.43        | 96.35        | 100.00       | 96.21        | 100.00       | 95.79        | 92.01        | 94.11        | 97.47        | 94.95        | 92.85          | 92.01                 | 92.01      | 100.00            | 94.11             | 94.53    | 93.27        | 94.11        | 93.69      | 94.95     | 96.21     | 96.21        | 94.53         | 95.79        | 95.79       | 95.79         | 94.53         | 93.69      | 95.79     | 96.21      | 98.31      | 94.53     | 94.95  | 94.53 | 94.95 | 97.05 | 94.95 | 95.37 |       |
| CTLV-TL112          | MH108982              | 92.43          | 91.59        | 91.87        | 94.67        | 91.59        | 92.43        | 91.59        | 91.59        | 92.01        | 94.11        | 95.37        | 94.53        | 92.85          | 92.01                 | 92.01      | 95.79             | 94.11             | 94.53    | 93.27        | 94.11        | 93.27      | 94.95     | 95.79     | 95.79        | 94.53         | 95.79        | 95.37       | 95.37         | 94.53         | 93.69      | 95.79     | 95.37      | 92.85      | 93.69     | 95.79  | 95.37 | 94.11 | 94.95 | 96.21 | 94.11 | 94.53 |
| CTLV-TL113          | MH108983              | 90.19          | 90.05        | 90.33        | 90.75        | 90.05        | 90.33        | 90.05        | 90.05        | 90.19        | 95.37        | 91.59        | 94.95        | 94.11          | 100.00                | 100.00     | 92.01             | 95.37             | 95.79    | 94.95        | 95.79        | 91.59      | 94.95     | 94.53     | 94.53        | 93.69         | 94.11        | 94.53       | 94.11         | 93.69         | 95.79      | 94.53     | 93.69      | 92.01      | 93.69     | 92.01  | 92.85 | 93.27 | 94.53 | 93.27 | 92.01 |       |
| CTLV-TL114          | MH108984              | 90.47          | 90.75        | 91.03        | 91.31        | 90.75        | 91.17        | 90.75        | 90.75        | 90.89        | 96.63        | 93.69        | 94.95        | 97.47          | 95.37                 | 95.37      | 94.11             | 100.00            | 98.73    | 98.31        | 99.57        | 92.85      | 94.95     | 96.21     | 96.21        | 94.95         | 95.37        | 95.37       | 94.11         | 94.95         | 94.11      | 94.11     | 94.53      | 96.63      | 94.53     | 94.53  | 94.53 | 94.53 | 94.53 | 94.53 | 94.53 |       |
| CTLV-TL115          | MH108985              | 92.01          | 96.07        | 96.35        | 94.95        | 96.07        | 97.89        | 96.07        | 96.07        | 92.57        | 89.91        | 90.75        | 94.11        | 92.43          | 91.59                 | 91.59      | 97.47             | 93.69             | 94.53    | 92.85        | 93.69        | 93.27      | 94.95     | 96.21     | 96.21        | 94.53         | 95.79        | 95.79       | 95.79         | 94.53         | 93.27      | 95.79     | 95.79      | 99.15      | 95.37     | 94.95  | 94.53 | 94.95 | 97.05 | 94.95 | 95.37 |       |
| CTLV-MTH            | KC588948              | 97.89          | 91.45        | 91.73        | 92.99        | 91.73        | 91.73        | 91.73        | 91.73        | 92.71        | 90.33        | 91.17        | 91.59        | 94.11          | 94.95                 | 94.95      | 94.95             | 94.95             | 95.79    | 94.53        | 95.37        | 92.43      | 98.73     | 97.05     | 97.05        | 96.21         | 96.21        | 96.63       | 96.63         | 96.21         | 94.53      | 96.63     | 96.63      | 96.21      | 94.53     | 95.37  | 94.11 | 96.21 | 95.37 | 97.05 | 94.11 | 94.53 |
| CTLV-XHC            | KC588947              | 89.77          | 90.05        | 90.33        | 90.33        | 90.05        | 90.47        | 90.05        | 90.05        | 89.91        | 95.65        | 98.17        | 90.05        | 90.47          | 94.11                 | 94.11      | 92.85             | 97.47             | 97.05    | 97.05        | 97.89        | 91.59      | 94.11     | 95.37     | 95.37        | 94.11         | 94.53        | 94.95       | 94.95         | 94.11         | 95.79      | 95.37     | 94.53      | 92.85      | 93.69     | 95.79  | 95.37 | 94.53 | 92.85 | 93.27 | 92.85 |       |
| CTLV-Pk             | JX416228              | 90.19          | 90.05        | 90.33        | 90.75        | 90.05        | 90.33        | 90.05        | 90.05        | 90.19        | 100.00       | 96.63        | 89.91        | 90.33          | 95.65                 | 100.00     | 92.01             | 95.37             | 95.79    | 94.95        | 95.79        | 91.59      | 94.95     | 94.53     | 94.53        | 93.69         | 94.11        | 94.53       | 94.11         | 93.69         | 95.79      | 94.53     | 93.69      | 92.01      | 93.69     | 92.01  | 92.85 | 93.27 | 94.53 | 93.27 | 92.01 |       |
| CTLV-Ponkan8        | KY706358              | 90.19          | 90.05        | 90.33        | 90.75        | 90.05        | 90.33        | 90.05        | 90.05        | 90.19        | 100.00       | 96.63        | 89.91        | 90.33          | 95.65                 | 100.00     | 92.01             | 95.37             | 95.79    | 94.95        | 95.79        | 91.59      | 94.95     | 94.53     | 94.53        | 93.69         | 94.11        | 94.53       | 94.11         | 93.69         | 95.79      | 94.53     | 93.69      | 92.01      | 93.69     | 92.01  | 92.85 | 93.27 | 94.53 | 93.27 | 92.01 |       |
| CTLV-ML             | EU553489              | 91.59          | 99.15        | 99.43        | 96.35        | 100.00       | 96.21        | 100.00       | 100.00       | 91.59        | 90.05        | 90.75        | 96.07        | 91.73          | 90.05                 | 90.05      | 90.05             | 94.11             | 94.53    | 93.27        | 94.11        | 93.69      | 94.95     | 96.21     | 96.21        | 94.53         | 95.79        | 95.79       | 95.79         | 94.53         | 93.69      | 95.79     | 96.21      | 98.31      | 94.53     | 94.95  | 94.53 | 94.95 | 97.05 | 94.95 | 95.37 |       |
| CTLV-Kumquat1       | AY646511              | 90.47          | 90.75        | 91.03        | 91.31        | 90.75        | 91.17        | 90.75        | 90.75        | 90.89        | 96.63        | 100.00       | 90.75        | 91.17          | 98.17                 | 96.63      | 96.63             | 90.75             | 98.73    | 98.31        | 99.57        | 92.85      | 94.95     | 96.21     | 96.21        | 94.95         | 95.37        | 95.79       | 95.79         | 94.95         | 97.47      | 96.21     | 95.37      | 94.11      | 94.95     | 94.11  | 94.11 | 94.53 | 96.63 | 94.53 | 94.11 |       |
| CTLV-CLdNA-1        | FJ355920              | 90.33          | 90.47        | 90.75        | 90.75        | 90.47        | 91.45        | 90.47        | 90.47        | 90.33        | 95.93        | 97.47        | 90.75        | 90.75          | 97.33                 | 95.93      | 95.93             | 90.47             | 97.47    | 97.47        | 96.21        | 97.47      | 97.47     | 96.21     | 96.63        | 97.05         | 97.05        | 96.21       | 97.89         | 97.47         | 96.63      | 94.95     | 95.79      | 94.95      | 95.37     | 95.79  | 97.47 | 95.37 | 94.95 |       |       |       |
| CTLV-Shatang Orange | JQ765412              | 90.33          | 90.33        | 90.61        | 90.89        | 90.33        | 90.75        | 90.33        | 90.33        | 90.47        | 96.21        | 98.45        | 90.33        | 91.03          | 98.31                 | 96.21      | 96.21             | 90.33             | 98.45    | 97.61        | 98.73        | 92.01      | 94.53     | 95.79     | 95.79        | 94.53         | 94.95        | 95.37       | 95.37         | 94.53         | 97.05      | 95.79     | 94.95      | 93.27      | 94.95     | 93.69  | 93.69 | 94.11 | 95.79 | 93.69 | 93.27 |       |
| CTLV-HJY            | MH144341              | 90.47          | 91.17        | 91.45        | 91.45        | 91.17        | 91.59        | 91.17        | 91.17        | 90.75        | 96.63        | 99.01        | 91.17        | 91.17          | 98.59                 | 96.63      | 96.63             | 91.17             | 99.01    | 98.17        | 98.87        | 92.85      | 95.37     | 96.63     | 96.63        | 95.37         | 95.79        | 96.21       | 96.21         | 95.37         | 97.89      | 96.63     | 95.79      | 94.11      | 94.95     | 94.11  | 94.53 | 94.95 | 96.63 | 94.53 | 94.11 |       |
| CTLV-ASGV-1-HJY     | MH144342              | 91.17          | 89.49        | 89.77        | 91.17        | 89.77        | 90.61        | 89.77        | 89.77        | 94.11        | 88.65        | 89.21        | 90.19        | 91.31          | 88.51                 | 88.65      | 88.65             | 89.77             | 89.21    | 89.21        | 88.79        | 89.35      | 93.69     | 95.37     | 95.37        | 93.69         | 94.53        | 94.11       | 94.53         | 93.69         | 92.43      | 94.95     | 95.37      | 94.11      | 93.69     | 92.85  | 92.85 | 94.53 | 94.95 | 92.43 | 92.85 |       |
| CTLV-ASGV-2-HJY     | MH144343              | 98.17          | 90.75        | 91.03        | 92.71        | 91.03        | 91.45        | 91.03        | 91.03        | 91.59        | 89.49        | 90.19        | 91.59        | 96.91          | 89.49                 | 89.49      | 91.03             | 90.19             | 90.05    | 90.05        | 90.19        | 90.33      | 97.47     | 97.47     | 96.63        | 94.53         | 97.05        | 97.05       | 96.63         | 94.53         | 97.05      | 96.63     | 95.37      | 96.21      | 94.53     | 97.05  | 96.63 | 97.47 | 95.37 | 94.95 |       |       |
| CTLV-L              | D16681                | 94.67          | 91.59        | 91.87        | 92.99        | 92.01        | 92.85        | 92.01        | 92.01        | 92.85        | 89.77        | 90.61        | 92.85        | 94.25          | 89.63                 | 89.77      | 89.77             | 92.01             | 90.61    | 90.05        | 90.19        | 90.47      | 91.03     | 93.97     | 100.00       | 98.31         | 98.31        | 98.73       | 98.73         | 98.31         | 96.21      | 99.57     | 99.15      | 96.63      | 96.63     | 96.21  | 97.05 | 98.31 | 99.15 | 95.79 | 96.63 |       |
| ASGV-Li-23          | AB004063              | 94.39          | 91.87        | 92.15        | 93.27        | 92.29        | 93.13        | 92.29        | 92.29        | 92.85        | 89.77        | 90.61        | 93.13        | 94.25          | 89.91                 | 89.77      | 89.77             | 92.29             | 90.61    | 90.33        | 90.47        | 90.75      | 91.31     | 93.97     | 99.71        | 98.31         | 98.31        | 98.73       | 98.73         | 98.31         | 96.21      | 99.57     | 99.15      | 96.63      | 96.63     | 96.21  | 97.05 | 98.31 | 99.15 |       |       |       |
