# Supplementary material for: Full genome characterization of 12 citrus tatter leaf virus isolates for the development of a detection assay
Source: PubMed Central journal article supplement (PMC6797102; doi:10.1371/journal.pone.0223958), 2019-10-17
Supplement: pone.0223958.s011.pdf [file pone.0223958.s011.pdf]

**S10 Table. Nucleotide (below diagonal) and amino acid (above diagonal) sequences identities (%) of movement protein (MP).**

| Isolate             | Genbank   | CTLV-IPPN122 | CTLV-TL100 | CTLV-TL101 | CTLV-TL102 | CTLV-TL103 | CTLV-TL104 | CTLV-TL110 | CTLV-TL111 | CTLV-TL112 | CTLV-TL113 | CTLV-TL114 | CTLV-TL115 | CTLV-MTH | CTLV-XHC | CTLV-PK | CTLV-Ponkan8 | CTLV-ML | CTLV-Kumquat1 | CTLV-LCdNA-1 | CTLV-Shatang Orange | CTLV-HJY | CTLV-ASGV-1-HJY | CTLV-ASGV-2-HJY | CTLV-VL | ASGV-Li-23 | ASGV-P-209 | ASGV-p12 | ASGV-AC | ASGV-HH | ASGV-241KP | ASGV-Matsuco | ASGV-FKSS2 | ASGV-N297 | ASGV-Kiyomi | ASGV-Nagami | ASGV-kfp | ASGV-Ac | ASGV-CHN | ASGV-YTG | ASGV-YTG | ASGV-HT | PBNLSV |
|---------------------|-----------|--------------|------------|------------|------------|------------|------------|------------|------------|------------|------------|------------|------------|----------|----------|---------|--------------|---------|---------------|--------------|---------------------|----------|-----------------|-----------------|---------|------------|------------|----------|---------|---------|------------|--------------|------------|-----------|-------------|-------------|----------|---------|----------|----------|----------|---------|--------|
| CTLV-IPPN122        | MH108986  | 96.26        | 96.26      | 95.95      | 95.63      | 96.26      | 95.63      | 95.63      | 94.70      | 95.95      | 95.63      | 95.63      | 97.19      | 95.32    | 95.95    | 95.95   | 95.63        | 95.63   | 95.32         | 95.32        | 95.63               | 96.26    | 95.95           | 95.32           | 97.19   | 96.26      | 96.26      | 94.08    | 94.39   | 95.95   | 95.01      | 94.08        | 96.26      | 97.19     | 97.50       | 96.26       | 96.57    | 97.19   | 96.26    | 93.76    | 97.19    | 95.32   | 93.45  |
| CTLV-TL100          | MH108975  | 85.87        | 100.00     | 99.68      | 99.37      | 99.37      | 99.37      | 99.37      | 96.57      | 96.57      | 96.26      | 98.75      | 97.81      | 95.32    | 96.57    | 96.57   | 99.37        | 96.26   | 96.57         | 95.95        | 96.88               | 96.57    | 97.19           | 96.26           | 96.26   | 96.26      | 96.26      | 95.01    | 96.57   | 96.26   | 96.26      | 96.88        | 97.81      | 97.50     | 99.37       | 97.50       | 97.19    | 96.88   | 94.39    | 97.19    | 96.88    | 95.01   |        |
| CTLV-TL101          | MH108976  | 86.29        | 98.85      | 99.68      | 99.37      | 99.37      | 99.37      | 99.37      | 96.57      | 96.57      | 96.26      | 98.75      | 97.81      | 95.32    | 96.57    | 96.57   | 99.37        | 96.26   | 96.57         | 95.95        | 96.88               | 96.57    | 97.19           | 96.26           | 96.26   | 96.26      | 96.26      | 95.01    | 96.57   | 96.26   | 96.26      | 96.88        | 97.81      | 97.50     | 99.37       | 97.50       | 97.19    | 96.88   | 94.39    | 97.19    | 96.88    | 95.01   |        |
| CTLV-TL102          | MH108977  | 86.18        | 98.44      | 98.96      | 99.06      | 99.06      | 99.06      | 99.06      | 96.26      | 96.26      | 95.95      | 98.44      | 97.50      | 95.01    | 96.26    | 96.26   | 99.06        | 95.95   | 96.26         | 95.63        | 96.57               | 96.26    | 96.88           | 95.95           | 95.95   | 95.95      | 94.70      | 96.26    | 95.95   | 95.95   | 95.95      | 96.57        | 97.50      | 97.19     | 99.06       | 97.19       | 96.88    | 96.57   | 94.08    | 96.88    | 96.57    | 94.70   |        |
| CTLV-TL103          | MH108978  | 86.08        | 98.54      | 98.85      | 98.44      | 98.75      | 100.00     | 100.00     | 95.95      | 95.95      | 95.63      | 98.75      | 97.19      | 94.70    | 95.95    | 95.95   | 100.00       | 95.63   | 95.95         | 95.32        | 96.26               | 95.95    | 96.57           | 95.63           | 95.63   | 95.95      | 94.39      | 95.95    | 95.63   | 95.95   | 96.26      | 97.19        | 96.88      | 98.75     | 96.88       | 97.19       | 96.26    | 93.76   | 96.57    | 96.26    | 94.39    |         |        |
| CTLV-TL104          | MH108979  | 87.33        | 94.28      | 94.60      | 94.60      | 94.91      | 98.75      | 98.75      | 96.57      | 96.57      | 96.26      | 98.75      | 97.19      | 95.32    | 96.57    | 96.57   | 98.75        | 96.26   | 96.57         | 95.95        | 96.88               | 96.57    | 97.19           | 96.57           | 96.57   | 96.57      | 94.70      | 96.26    | 96.26   | 96.57   | 96.26      | 97.50        | 97.81      | 99.37     | 97.19       | 97.19       | 97.50    | 94.39   | 97.81    | 96.57    | 95.01    |         |        |
| CTLV-TL110          | MH108980  | 86.08        | 98.54      | 98.85      | 98.44      | 100.00     | 94.91      | 100.00     | 95.95      | 95.95      | 95.63      | 98.75      | 97.19      | 94.70    | 95.95    | 95.95   | 100.00       | 95.63   | 95.95         | 95.32        | 96.26               | 95.95    | 96.57           | 95.63           | 95.63   | 95.95      | 94.39      | 95.95    | 95.63   | 95.95   | 96.26      | 97.19        | 96.88      | 98.75     | 96.88       | 97.19       | 96.26    | 93.76   | 96.57    | 96.26    | 94.39    |         |        |
| CTLV-TL111          | MH108981  | 86.08        | 98.54      | 98.85      | 98.44      | 100.00     | 94.91      | 100.00     | 95.95      | 95.95      | 95.63      | 98.75      | 97.19      | 94.70    | 95.95    | 95.95   | 100.00       | 95.63   | 95.95         | 95.32        | 96.26               | 95.95    | 96.57           | 95.63           | 95.63   | 95.95      | 94.39      | 95.95    | 95.63   | 95.95   | 96.26      | 97.19        | 96.88      | 98.75     | 96.88       | 97.19       | 96.26    | 93.76   | 96.57    | 96.26    | 94.39    |         |        |
| CTLV-TL112          | MH108982  | 85.56        | 87.44      | 88.05      | 87.64      | 88.16      | 86.91      | 88.16      | 88.16      | 88.16      | 97.50      | 95.32      | 95.95      | 96.88    | 97.50    | 97.50   | 95.95        | 97.50   | 99.37         | 97.50        | 97.81               | 96.26    | 95.01           | 95.01           | 95.01   | 95.01      | 94.39      | 96.26    | 95.63   | 95.01   | 97.19      | 96.57        | 96.26      | 95.95     | 96.26       | 95.01       | 95.63    | 93.14   | 96.88    | 93.45    | 92.21    |         |        |
| CTLV-TL113          | MH108983  | 85.56        | 87.12      | 86.70      | 86.50      | 87.01      | 86.08      | 87.01      | 87.01      | 94.91      | 99.06      | 95.32      | 97.81      | 98.13    | 100.00   | 100.00  | 95.95        | 99.06   | 98.13         | 98.44        | 99.68               | 96.26    | 96.88           | 96.88           | 96.88   | 95.63      | 95.01      | 96.88    | 96.88   | 95.63   | 99.06      | 98.44        | 98.13      | 95.95     | 96.88       | 96.26       | 96.88    | 94.39   | 97.50    | 94.70    | 93.45    |         |        |
| CTLV-TL114          | MH108984  | 85.77        | 86.70      | 86.50      | 86.70      | 86.60      | 86.18      | 86.60      | 86.60      | 94.91      | 95.01      | 95.01      | 97.50      | 97.81    | 99.06    | 99.06   | 95.63        | 100.00  | 97.81         | 98.13        | 99.37               | 96.26    | 96.57           | 96.57           | 95.63   | 95.32      | 94.70      | 96.57    | 96.57   | 95.32   | 98.75      | 98.13        | 97.81      | 95.63     | 96.57       | 95.95       | 96.57    | 94.08   | 97.19    | 94.39    | 93.14    |         |        |
| CTLV-TL115          | MH108985  | 86.39        | 93.66      | 93.76      | 93.97      | 94.49      | 96.88      | 94.49      | 94.49      | 86.18      | 85.06      | 86.29      | 96.57      | 94.08    | 95.32    | 98.75   | 95.01        | 95.32   | 94.70         | 95.63        | 95.95               | 96.57    | 95.63           | 95.63           | 95.32   | 94.39      | 95.32      | 95.01    | 95.32   | 95.63   | 96.57      | 96.88        | 99.37      | 96.57     | 97.19       | 96.26       | 93.76    | 96.57   | 95.95    | 94.08    |          |         |        |
| CTLV-MTH            | KCS588948 | 87.33        | 85.66      | 85.35      | 85.15      | 85.46      | 86.29      | 85.46      | 85.46      | 84.73      | 85.35      | 85.87      | 86.29      | 96.57    | 97.81    | 97.81   | 97.19        | 97.50   | 96.57         | 96.88        | 98.13               | 96.26    | 98.13           | 97.19           | 97.19   | 95.32      | 95.32      | 96.88    | 95.95   | 95.32   | 98.13      | 98.75        | 98.44      | 97.19     | 97.81       | 97.50       | 97.81    | 94.08   | 97.50    | 95.95    | 94.08    |         |        |
| CTLV-XHC            | KCS588947 | 84.63        | 86.29      | 85.87      | 85.87      | 86.18      | 85.35      | 86.18      | 86.18      | 94.08      | 93.87      | 97.40      | 85.66      | 85.04    | 98.13    | 98.13   | 94.70        | 97.81   | 97.50         | 97.81        | 98.44               | 95.01    | 95.63           | 95.63           | 95.63   | 94.39      | 93.76      | 95.63    | 95.63   | 94.39   | 98.44      | 97.19        | 96.88      | 94.70     | 95.63       | 95.63       | 95.63    | 93.45   | 96.26    | 93.45    | 92.83    |         |        |
| CTLV-Pk             | JX416228  | 85.56        | 87.12      | 86.70      | 86.50      | 87.01      | 86.08      | 87.01      | 87.01      | 94.91      | 100.00     | 95.01      | 85.56      | 85.35    | 93.87    | 100.00  | 95.95        | 99.06   | 98.13         | 98.44        | 99.68               | 96.26    | 96.88           | 96.88           | 96.88   | 95.63      | 95.01      | 96.88    | 96.88   | 95.63   | 99.06      | 98.44        | 98.13      | 95.95     | 96.88       | 96.26       | 96.88    | 94.39   | 97.50    | 94.70    | 93.45    |         |        |
| CTLV-Ponkan8        | KY706358  | 85.56        | 87.12      | 86.70      | 86.50      | 87.01      | 86.08      | 87.01      | 87.01      | 94.91      | 100.00     | 95.01      | 85.56      | 85.35    | 93.87    | 100.00  | 95.95        | 99.06   | 98.13         | 98.44        | 99.68               | 96.26    | 96.88           | 96.88           | 96.88   | 95.63      | 95.01      | 96.88    | 96.88   | 95.63   | 99.06      | 98.44        | 98.13      | 95.95     | 96.88       | 96.26       | 96.88    | 94.39   | 97.50    | 94.70    | 93.45    |         |        |
| CTLV-ML             | EUS53489  | 86.08        | 98.54      | 98.85      | 98.44      | 100.00     | 94.91      | 100.00     | 100.00     | 88.16      | 87.01      | 86.60      | 94.49      | 85.46    | 86.18    | 87.01   | 87.01        | 95.63   | 95.95         | 95.32        | 96.26               | 95.95    | 96.57           | 95.63           | 95.63   | 95.95      | 94.39      | 95.95    | 95.63   | 95.95   | 96.26      | 97.19        | 96.88      | 98.75     | 96.88       | 97.19       | 96.26    | 93.76   | 96.57    | 96.26    | 94.39    |         |        |
| CTLV-Kumquat1       | AY646511  | 85.77        | 86.70      | 86.50      | 86.70      | 86.60      | 86.18      | 86.60      | 86.60      | 94.91      | 95.01      | 100.00     | 86.29      | 85.87    | 97.40    | 95.01   | 95.01        | 86.60   | 97.81         | 98.13        | 99.37               | 96.26    | 96.57           | 96.57           | 95.32   | 94.70      | 96.57      | 96.57    | 95.32   | 98.75   | 98.13      | 97.81        | 95.63      | 96.57     | 95.95       | 96.57       | 94.08    | 97.19   | 94.39    | 93.14    |          |         |        |
| CTLV-LCd-NA-1       | FJ355920  | 85.87        | 88.47      | 88.05      | 87.64      | 88.16      | 86.91      | 88.16      | 88.16      | 99.58      | 95.32      | 95.11      | 86.18      | 85.04    | 94.49    | 95.32   | 95.32        | 88.16   | 97.81         | 98.44        | 96.26               | 95.63    | 95.63           | 95.63           | 95.63   | 95.01      | 96.88      | 96.26    | 95.63   | 97.81   | 97.19      | 96.88        | 95.95      | 96.88     | 95.63       | 96.26       | 93.76    | 97.50   | 94.08    | 92.21    |          |         |        |
| CTLV-Shatang Orange | JQ765412  | 85.35        | 86.50      | 86.29      | 86.29      | 86.60      | 85.98      | 86.60      | 86.60      | 95.01      | 94.70      | 98.44      | 86.08      | 85.46    | 97.71    | 94.70   | 94.70        | 86.60   | 98.44         | 95.43        | 98.75               | 95.32    | 96.57           | 95.95           | 95.95   | 94.70      | 94.08      | 95.95    | 95.95   | 94.70   | 98.13      | 97.50        | 97.19      | 95.32     | 96.57       | 95.32       | 95.95    | 93.45   | 96.57    | 93.76    | 92.83    |         |        |
| CTLV-HJY            | MH144341  | 85.46        | 86.91      | 86.50      | 86.50      | 86.81      | 86.39      | 86.81      | 86.81      | 94.80      | 94.60      | 97.61      | 86.50      | 85.77    | 97.09    | 94.60   | 94.60        | 86.81   | 97.61         | 95.22        | 97.71               | 96.57    | 97.19           | 97.19           | 97.19   | 95.95      | 95.32      | 97.19    | 97.19   | 95.95   | 99.37      | 98.75        | 98.44      | 96.26     | 97.19       | 96.57       | 97.19    | 94.70   | 97.81    | 95.01    | 93.76    |         |        |
| CTLV-ASGV-1-HJY     | MH144342  | 84.42        | 86.18      | 86.08      | 86.08      | 85.98      | 87.33      | 85.98      | 85.98      | 84.63      | 84.83      | 85.46      | 86.81      | 84.31    | 85.25    | 84.83   | 84.83        | 85.98   | 85.46         | 84.63        | 84.83               | 84.83    | 96.26           | 95.95           | 95.95   | 95.32      | 94.70      | 96.57    | 96.26   | 95.32   | 96.57      | 96.88        | 97.19      | 96.57     | 96.57       | 96.26       | 95.95    | 94.70   | 96.88    | 95.01    | 92.83    |         |        |
| CTLV-ASGV-2-HJY     | MH144343  | 89.92        | 84.94      | 84.63      | 84.83      | 84.73      | 86.18      | 84.73      | 84.73      | 84.21      | 84.83      | 84.94      | 85.25      | 90.34    | 83.90    | 84.83   | 84.83        | 84.73   | 84.94         | 84.52        | 84.11               | 84.83    | 84.11           | 97.19           | 97.19   | 95.63      | 94.70      | 96.26    | 95.63   | 95.63   | 97.19      | 98.13        | 98.44      | 97.19     | 98.13       | 97.50       | 97.19    | 93.45   | 97.50    | 95.63    | 93.76    |         |        |
| CTLV-L              | D16681    | 84.63        | 84.83      | 84.73      | 84.52      | 84.83      | 84.11      | 84.83      | 84.83      | 83.07      | 85.04      | 84.11      | 84.21      | 84.63    | 83.28    | 85.04   | 85.04        | 84.83   | 84.11         | 83.28        | 83.59               | 83.90    | 83.80           | 85.66           | 98.75   | 94.70      | 94.39      | 96.26    | 95.01   | 94.70   | 96.88      | 98.13        | 98.44      | 96.26     | 96.88       | 96.57       | 96.57    | 93.14   | 96.88    | 95.01    | 93.45    |         |        |
| ASGV-Li-23          | AB004063  | 84.94        | 85.25      | 85.15      | 84.94      | 85.04      | 84.31      | 85.04      | 85.04      | 83.28      | 85.25      | 84.31      | 84.21      | 84.94    | 83.48    | 85.25   | 85.25        | 85.04   | 84.31         | 83.48        | 83.80               | 84.11    | 84.11           | 85.98           | 98.75   | 94.70      | 94.39      | 96.26    | 95.01   | 94.70   | 96.88      | 98.13        | 98.44</    |           |             |             |          |         |          |          |          |         |        |
