# Supplementary material for: Full genome characterization of 12 citrus tatter leaf virus isolates for the development of a detection assay
Source: PLoS One. 2019 Oct 17;14(10):e0223958. doi: 10.1371/journal.pone.0223958 (PMC6797102; doi:10.1371/journal.pone.0223958)
Supplement: S4 Table — (PDF) [file pone.0223958.s005.pdf]

**S4 Table. Nucleotide sequence identities (%) of coat protein (CP) and 3'-untranslated region (3'-UTR).**

| Isolate             | GenBank  | CTLV-IPPN122 | CTLV-TL100 | CTLV-TL101 | CTLV-TL102 | CTLV-TL103 | CTLV-TL104 | CTLV-TL110 | CTLV-TL111 | CTLV-TL112 | CTLV-TL113 | CTLV-TL114 | CTLV-TL115 | CTLV-MTH | CTLV-XHC | CTLV-Pk | CTLV-Ponkan8 | CTLV-ML | CTLV-Kumquat1 | CTLV-LCd-NA-1 | CTLV-Shatang Orange | CTLV-HJY | CTLV-ASGV-1-HJY | CTLV-ASGV-2-HJY | ASGV-Matsuo | ASGV-FKSS2 | ASGV-N297 | ASGV-Kiyomi | ASGV-Nagami | CTLV-L | ASGV-Li-23 | ASGV-P-209 | ASGVp12 | ASGV-AC | ASGV-HH | ASGV-241KP | ASGV-kfp | ASGV-Ac | ASGV-CHN | ASGV-YTG | ASGV-HT | PBNLSV |  |  |  |
|---------------------|----------|--------------|------------|------------|------------|------------|------------|------------|------------|------------|------------|------------|------------|----------|----------|---------|--------------|---------|---------------|---------------|---------------------|----------|-----------------|-----------------|-------------|------------|-----------|-------------|-------------|--------|------------|------------|---------|---------|---------|------------|----------|---------|----------|----------|---------|--------|--|--|--|
| CTLV-IPPN122        | MH108986 |              |            |            |            |            |            |            |            |            |            |            |            |          |          |         |              |         |               |               |                     |          |                 |                 |             |            |           |             |             |        |            |            |         |         |         |            |          |         |          |          |         |        |  |  |  |
| CTLV-TL100          | MH108975 | 91.22        |            |            |            |            |            |            |            |            |            |            |            |          |          |         |              |         |               |               |                     |          |                 |                 |             |            |           |             |             |        |            |            |         |         |         |            |          |         |          |          |         |        |  |  |  |
| CTLV-TL101          | MH108976 | 91.22        | 99.53      |            |            |            |            |            |            |            |            |            |            |          |          |         |              |         |               |               |                     |          |                 |                 |             |            |           |             |             |        |            |            |         |         |         |            |          |         |          |          |         |        |  |  |  |
| CTLV-TL102          | MH108977 | 93.10        | 96.72      | 96.72      |            |            |            |            |            |            |            |            |            |          |          |         |              |         |               |               |                     |          |                 |                 |             |            |           |             |             |        |            |            |         |         |         |            |          |         |          |          |         |        |  |  |  |
| CTLV-TL103          | MH108978 | 91.57        | 98.83      | 98.83      | 96.49      |            |            |            |            |            |            |            |            |          |          |         |              |         |               |               |                     |          |                 |                 |             |            |           |             |             |        |            |            |         |         |         |            |          |         |          |          |         |        |  |  |  |
| CTLV-TL104          | MH108979 | 92.16        | 96.14      | 96.14      | 95.43      | 96.14      |            |            |            |            |            |            |            |          |          |         |              |         |               |               |                     |          |                 |                 |             |            |           |             |             |        |            |            |         |         |         |            |          |         |          |          |         |        |  |  |  |
| CTLV-TL110          | MH108980 | 91.46        | 99.18      | 99.18      | 96.37      | 99.64      | 95.78      |            |            |            |            |            |            |          |          |         |              |         |               |               |                     |          |                 |                 |             |            |           |             |             |        |            |            |         |         |         |            |          |         |          |          |         |        |  |  |  |
| CTLV-TL111          | MH108981 | 91.46        | 99.18      | 99.18      | 96.37      | 99.64      | 95.78      | 100.00     |            |            |            |            |            |          |          |         |              |         |               |               |                     |          |                 |                 |             |            |           |             |             |        |            |            |         |         |         |            |          |         |          |          |         |        |  |  |  |
| CTLV-TL112          | MH108982 | 93.22        | 91.11      | 91.11      | 93.92      | 91.22      | 92.51      | 91.11      | 91.11      |            |            |            |            |          |          |         |              |         |               |               |                     |          |                 |                 |             |            |           |             |             |        |            |            |         |         |         |            |          |         |          |          |         |        |  |  |  |
| CTLV-TL113          | MH108983 | 91.23        | 89.94      | 89.94      | 90.77      | 90.05      | 90.64      | 89.94      | 89.94      | 91.35      |            |            |            |          |          |         |              |         |               |               |                     |          |                 |                 |             |            |           |             |             |        |            |            |         |         |         |            |          |         |          |          |         |        |  |  |  |
| CTLV-TL114          | MH108984 | 91.35        | 90.29      | 90.29      | 91.00      | 90.40      | 91.11      | 90.29      | 90.29      | 91.58      | 96.84      |            |            |          |          |         |              |         |               |               |                     |          |                 |                 |             |            |           |             |             |        |            |            |         |         |         |            |          |         |          |          |         |        |  |  |  |
| CTLV-TL115          | MH108985 | 92.16        | 95.90      | 95.90      | 95.20      | 95.90      | 97.89      | 95.78      | 95.78      | 92.51      | 90.17      | 90.64      |            |          |          |         |              |         |               |               |                     |          |                 |                 |             |            |           |             |             |        |            |            |         |         |         |            |          |         |          |          |         |        |  |  |  |
| CTLV-MTH            | KC588948 | 98.13        | 91.46      | 91.46      | 92.99      | 91.81      | 92.16      | 91.69      | 91.69      | 93.34      | 91.47      | 92.05      | 91.92      |          |          |         |              |         |               |               |                     |          |                 |                 |             |            |           |             |             |        |            |            |         |         |         |            |          |         |          |          |         |        |  |  |  |
| CTLV-XHC            | KC588947 | 90.78        | 89.70      | 89.70      | 90.18      | 89.82      | 90.52      | 89.70      | 89.70      | 90.77      | 96.02      | 98.24      | 90.05      | 91.48    |          |         |              |         |               |               |                     |          |                 |                 |             |            |           |             |             |        |            |            |         |         |         |            |          |         |          |          |         |        |  |  |  |
| CTLV-Pk             | JX416228 | 91.23        | 89.94      | 89.94      | 90.77      | 90.05      | 90.64      | 89.94      | 89.94      | 91.35      | 100.00     | 96.84      | 90.17      | 91.47    | 96.02    |         |              |         |               |               |                     |          |                 |                 |             |            |           |             |             |        |            |            |         |         |         |            |          |         |          |          |         |        |  |  |  |
| CTLV-Ponkan8        | KY706358 | 91.13        | 89.94      | 89.94      | 90.77      | 90.05      | 90.64      | 89.94      | 89.94      | 91.35      | 100.00     | 96.84      | 90.17      | 91.36    | 95.91    | 100.00  |              |         |               |               |                     |          |                 |                 |             |            |           |             |             |        |            |            |         |         |         |            |          |         |          |          |         |        |  |  |  |
| CTLV-ML             | EU553489 | 91.46        | 99.18      | 99.18      | 96.37      | 99.64      | 95.78      | 100.00     | 100.00     | 91.11      | 89.94      | 90.29      | 95.78      | 91.69    | 89.70    | 89.94   | 89.94        |         |               |               |                     |          |                 |                 |             |            |           |             |             |        |            |            |         |         |         |            |          |         |          |          |         |        |  |  |  |
| CTLV-Kumquat1       | AY646511 | 91.24        | 90.29      | 90.29      | 91.00      | 90.40      | 91.11      | 90.29      | 90.29      | 91.58      | 96.84      | 100.00     | 90.64      | 91.94    | 98.13    | 96.84   | 96.84        | 90.29   |               |               |                     |          |                 |                 |             |            |           |             |             |        |            |            |         |         |         |            |          |         |          |          |         |        |  |  |  |
| CTLV-LCd-NA-1       | FJ355920 | 91.24        | 90.17      | 90.17      | 90.65      | 90.29      | 91.46      | 90.17      | 90.17      | 91.47      | 96.49      | 97.42      | 90.76      | 91.59    | 97.19    | 96.49   | 96.49        | 90.17   | 97.43         |               |                     |          |                 |                 |             |            |           |             |             |        |            |            |         |         |         |            |          |         |          |          |         |        |  |  |  |
| CTLV-Shatang Orange | JQ765412 | 91.36        | 90.17      | 90.17      | 90.77      | 90.29      | 90.99      | 90.17      | 90.17      | 91.35      | 96.61      | 98.36      | 90.52      | 92.06    | 98.24    | 96.61   | 96.49        | 90.17   | 98.24         | 97.54         |                     |          |                 |                 |             |            |           |             |             |        |            |            |         |         |         |            |          |         |          |          |         |        |  |  |  |
| CTLV-HJY            | MH144341 | 91.58        | 90.76      | 90.76      | 91.23      | 90.87      | 91.57      | 90.76      | 90.76      | 91.70      | 96.96      | 98.83      | 91.11      | 92.17    | 98.48    | 96.96   | 96.96        | 90.76   | 98.83         | 98.36         | 98.83               |          |                 |                 |             |            |           |             |             |        |            |            |         |         |         |            |          |         |          |          |         |        |  |  |  |
| CTLV-ASGV-1-HJY     | MH144342 | 92.28        | 89.82      | 89.82      | 91.47      | 90.17      | 91.46      | 90.05      | 90.05      | 94.50      | 89.83      | 90.18      | 90.99      | 92.52    | 89.60    | 89.83   | 89.83        | 90.05   | 90.18         | 90.18         | 89.95               | 90.42    |                 |                 |             |            |           |             |             |        |            |            |         |         |         |            |          |         |          |          |         |        |  |  |  |
| CTLV-ASGV-2-HJY     | MH144343 | 98.24        | 90.52      | 90.52      | 92.40      | 90.87      | 91.81      | 90.76      | 90.76      | 92.75      | 90.65      | 91.12      | 91.81      | 97.07    | 90.53    | 90.65   | 90.65        | 90.76   | 91.12         | 91.12         | 91.12               | 91.35    | 91.58           |                 |             |            |           |             |             |        |            |            |         |         |         |            |          |         |          |          |         |        |  |  |  |
| ASGV-Matsuo         | LC084659 | 91.35        | 90.52      | 90.52      | 91.23      | 90.64      | 91.22      | 90.52      | 90.52      | 91.58      | 96.96      | 97.19      | 90.76      | 92.28    | 96.61    | 96.96   | 96.96        | 90.52   | 97.19         | 97.19         | 97.07               | 97.42    | 90.42           | 91.00           |             |            |           |             |             |        |            |            |         |         |         |            |          |         |          |          |         |        |  |  |  |
| ASGV-FKSS2          | LC143387 | 94.98        | 91.92      | 91.92      | 93.57      | 92.16      | 93.45      | 92.04      | 92.04      | 93.57      | 91.70      | 92.05      | 93.33      | 94.74    | 91.13    | 91.70   | 91.71        | 92.04   | 92.06         | 91.83         | 91.71               | 92.05    | 92.64           | 94.04           | 92.40       |            |           |             |             |        |            |            |         |         |         |            |          |         |          |          |         |        |  |  |  |
| ASGV-N297           | LC184610 | 94.50        | 91.81      | 91.81      | 93.22      | 92.04      | 93.33      | 91.92      | 91.92      | 93.45      | 91.23      | 91.35      | 93.21      | 94.50    | 90.77    | 91.23   | 91.23        | 91.92   | 91.35         | 91.35         | 91.35               | 91.58    | 92.99           | 93.92           | 91.93       | 98.24      |           |             |             |        |            |            |         |         |         |            |          |         |          |          |         |        |  |  |  |
| ASGV-Kiyomi         | LC184611 | 92.16        | 96.37      | 96.37      | 95.43      | 96.37      | 98.59      | 96.02      | 96.02      | 92.28      | 90.40      | 91.11      | 99.06      | 91.92    | 90.52    | 90.40   | 90.40        | 96.02   | 91.11         | 90.99         | 90.76               | 91.34    | 91.22           | 91.81           | 90.76       | 93.33      | 93.45     |             |             |        |            |            |         |         |         |            |          |         |          |          |         |        |  |  |  |
| ASGV-Nagami         | LC184612 | 94.73        | 90.52      | 90.52      | 92.04      | 90.40      | 91.81      | 90.76      | 90.76      | 92.74      | 90.17      | 90.99      | 91.69      | 95.08    | 90.64    | 90.17   | 90.17        | 90.76   | 90.99         | 91.46         | 91.34               | 91.34    | 92.51           | 93.68           | 90.05       | 93.45      | 93.56     | 91.92       |             |        |            |            |         |         |         |            |          |         |          |          |         |        |  |  |  |
| CTLV-L              | D16681   | 95.33        | 91.57      | 91.57      | 92.99      | 92.04      | 93.09      | 91.92      | 91.92      | 93.45      | 91.00      | 91.58      | 92.98      | 95.09    | 90.66    | 91.00   | 91.01        | 91.92   | 91.59         | 91.13         | 91.24               | 91.58    | 92.28           | 94.62           | 91.70       | 98.24      | 97.89     | 92.98       | 93.80       |        |            |            |         |         |         |            |          |         |          |          |         |        |  |  |  |
| ASGV-Li-23          | AB004063 | 95.21        | 91.81      | 91.81      | 93.22      | 92.28      | 93.33      | 92.16      | 92.16      | 93.45      | 91.00      | 91.58      | 93.21      | 95.21    | 91.00    | 91.00   | 91.00        | 92.16   | 91.58         | 91.35         | 91.58               | 91.82    | 92.52           | 94.62           | 91.93       | 98.01      | 98.13     | 93.21       | 93.80       | 99.76  |            |            |         |         |         |            |          |         |          |          |         |        |  |  |  |
| ASGV-P-209          | NC001749 | 92.99        | 90.17      | 90.17      | 92.17      | 90.52      | 90.87      | 90.40      | 90.40      | 92.75      | 90.65      | 90.42      | 90.64      | 92.75    | 89.83    | 90.65   | 90.65        | 90.40   | 90.42         | 90.42         | 90.42               | 90.53    | 91.12           | 92.64           | 90.65       | 93.10      | 92.75     | 90.64       | 91.92       | 92.99  | 93.22      |            |         |         |         |            |          |         |          |          |         |        |  |  |  |
| ASGVp12             | HE978837 | 92.87        | 90.87      | 90.87      | 92.17      | 90.64      | 91.34      | 90.52      | 90.52      | 91.82      | 90.53      | 90.30      | 91.22      | 92.40    | 89.95    | 90.53   | 90.53        | 90.52   | 90.30         | 90.77         | 90.53               | 90.77    | 89.95           | 92.40           | 90.77       | 93.57      | 92.87     | 91.46       | 91.11       | 93.34  | 93.34      | 91.82      |         |         |         |            |          |         |          |          |         |        |  |  |  |
| ASGV-AC             | KX988001 | 93.22        | 90.52      | 90.52      | 91.82      | 90.29      | 91.22      | 90.17      | 90.17      | 92.05      | 90.77      | 90.53      | 91.11      | 92.99    | 90.18    | 90.77   | 90.77        | 90.17   | 90.53         | 91.00         | 90.77               | 91.00    | 90.18           | 92.99           | 91.00       | 94.04      | 93.57     | 91.34       | 91.81       | 93.80  | 93.80      | 91.93      | 98.71   |         |         |            |          |         |          |          |         |        |  |  |  |
| ASGV-HH             | JN701424 | 93.10        | 90.99      | 90.99      | 92.40      | 91.11      | 92.16      | 90.87      | 90.87      | 92.40      | 91.23      | 91.23      | 91.57      | 93.10    | 90.88    | 91.23   | 91.23        | 90.87   | 91.23         | 91.47         | 91.23               | 91.70    | 91.23           | 92.52           | 91.12       | 94.39      | 93.80     | 91.92       | 92.28       | 94.39  | 94.39      | 92.75      | 92.40   | 93.22   |         |            |          |         |          |          |         |        |  |  |  |
| ASGV-241KP          | D14995   | 92.99        | 90.17      | 90.17      | 92.17      | 90.52      | 90.87      | 90.40      | 90.40      | 92.75      | 90.65      | 90.42      | 90.64      | 92.75    | 89.83    | 90.65   | 90.65        | 90.40   | 90.42         | 90.42         | 90.42               | 90.53    | 91.12           | 92.64           | 90.65       | 93.10      | 92.75     | 90.64       | 91.92       | 92.99  | 93.22      | 100.00     | 91.82   | 91.93   | 92.75   |            |          |         |          |          |         |        |  |  |  |
| ASGV-kfp            | KR106996 | 91.83        | 90.52      | 90.76      | 90.88      | 91.22      | 91.57      | 90.87      | 90.87      | 91.47      | 90.07      | 90.65      | 91.81      | 92.06    | 90.31    | 90.07   | 90.08        | 90.8    |               |               |                     |          |                 |                 |             |            |           |             |             |        |            |            |         |         |         |            |          |         |          |          |         |        |  |  |  |

CTLV: citrus tatter leaf virus; ASGV: apple stem grooving virus; PBNLSV: pear black necrotic leaf spot virus
